1 **Long dsRNA mediated RNA interference (dsRNAi) is antiviral in interferon**  
2 **competent mammalian cells**

3 SL Semple<sup>1</sup>, RA Jacob<sup>2,3,4</sup>, K Mossman<sup>2,3,4</sup> and SJ DeWitte-Orr<sup>1</sup>

4  
5

6 <sup>1</sup>Department of Health Sciences, Wilfrid Laurier University, Waterloo, ON, Canada.

7 <sup>2</sup>Department of Medicine, McMaster University, Hamilton, ON, Canada

8 <sup>3</sup>Michael G. DeGroot Institute for Infectious Disease Research, McMaster University, Hamilton, ON, Canada

9 <sup>4</sup>McMaster Immunology Research Centre, McMaster University, Hamilton, ON L8S 4K1, Canada

10  
11  
12  
13  
14  
15  
16  
17  
18  
19  
20  
21  
22  
23  
24  
25  
26  
27  
28  
29  
30  
31  
32  
33  
34  
35  
36  
37  
38  
39  
40  
41  
42  
43  
44  
45  
46  
47  
48  
49

**Corresponding Author:** Dr. Stephanie J. DeWitte-Orr

Department of Health Sciences and Biology

Wilfrid Laurier University

75 University Ave West

Waterloo, Ontario

Canada, N2L 3C5

Ph.519 884 0710 X4317

[sdewitteorr@wlu.ca](mailto:sdewitteorr@wlu.ca)

50 **Abstract**

51 In invertebrate cells, RNA interference (RNAi) acts as a powerful defense against virus infection by  
52 cleaving virally produced long dsRNA into siRNA by Dicer and loaded into RISC which can then  
53 destroy/disrupt complementary viral mRNA sequences. Comparatively in mammalian cells, the type I  
54 interferon (IFN) pathway is the cornerstone of the innate antiviral response. Although the cellular  
55 machinery for RNAi functions in mammalian cells, its role in the antiviral response remains controversial.  
56 Here we show that IFN competent mammalian cells engage in dsRNA-mediated RNAi. We found that pre-  
57 soaking mammalian cells with concentrations of sequence-specific dsRNA too low to induce IFN  
58 production could significantly inhibit viral replication, including SARS-CoV-2. This phenomenon was  
59 dependent on dsRNA length, was comparable in effect to transfected siRNAs, and could knockdown  
60 multiple sequences at once. Additionally, Dicer-knockout cell lines were incapable of this inhibition,  
61 confirming use of RNAi. This represents the first evidence that soaking with gene-specific dsRNA can  
62 generate viral knockdown in mammalian cells. Furthermore, demonstrating RNAi below the threshold of  
63 IFN induction has uses as a novel therapeutic platform.

64

65 **Keywords:** long dsRNA, pBECs, RNAi, type I interferons, viral inhibition

66

67

68

69

70

71

72

73

74

75

76

77

78

79

80

81

82

83

84

85

86

87

88

89

90

91

92

93

94

95

96

## 97 1. Introduction:

98 In their historic discovery of the DNA double-helix, Watson and Crick openly stated that a similar  
99 molecule derived from ribose was “probably impossible” due to its anticipated stereochemistry (Watson &  
100 Crick, 1953). Remarkably, just three years later, this sceptical view of double-stranded RNA (dsRNA) was  
101 disproven by Rich & Davies (1956) when polymers of polyadenylic acid were shown to hybridize with  
102 polyuridylic acid to produce diffraction patterns typical of a helical structure. This breakthrough would  
103 revolutionize techniques in molecular biology, but this was not the only field that would be heavily  
104 influenced. Because it was known that some viruses contained only RNA, the newfound double-stranded  
105 potential provided an answer for how this nucleic acid, and hence viruses, could replicate. Scientists now  
106 realize that essentially all viruses produce long dsRNA (>40 bp) at some point during replication and that  
107 this molecule is not found in normal, healthy cells (Weber *et al.*, 2006; Son *et al.*, 2015). Long dsRNA acts  
108 as a pathogen associated molecular pattern (PAMP) and is capable of alerting host immune defenses to viral  
109 infection (reviewed by DeWitte-Orr and Mossman, 2010). When dsRNA binds to its complementary pattern  
110 recognition receptors (PRRs), several downstream responses activate host antiviral immunity (reviewed by  
111 Jensen and Thomsen, 2012). Interestingly, the resultant antiviral immune response can vary significantly  
112 depending on whether the host is a vertebrate or not.

113 When long extracellular dsRNA is detected in a vertebrate host, rapid induction of the type I  
114 interferon (IFN) pathway occurs. In this scenario, extracellular dsRNA first binds to class A scavenger  
115 receptors (SR-As) located on the cell membrane (DeWitte-Orr *et al.*, 2010). The dsRNA is then taken up  
116 through receptor mediated endocytosis and remains in the endosome until it either binds to an endosomal  
117 PRR, called toll-like receptor 3 (TLR3, reviewed by Matsumoto *et al.*, 2014), or is transported into the  
118 cytoplasm via the SIDT2 molecular channel (Nguyen *et al.*, 2017). Once in the cytoplasm, the dsRNA is  
119 free to interact with cytoplasmic PRRs known as retinoic acid-inducible gene-I (RIG-I)-like receptors  
120 (RLRs) (reviewed by Rehwinkel and Gack, 2020). Regardless of their location, successful binding of  
121 dsRNA to PRRs induces a signaling cascade resulting in the production of type I IFNs, primarily IFN $\alpha$ s  
122 and IFN $\beta$  (reviewed by Li *et al.*, 2018). These antiviral cytokines can then act in an autocrine or paracrine  
123 manner by binding to their cognate receptors which induces expression of IFN-stimulated genes (ISGs),  
124 such as CXCL10 (reviewed by Borden *et al.*, 2007; Cheon *et al.*, 2014). Proteins encoded by ISGs can  
125 function to limit viral infection both directly, through inhibition of translation, and indirectly, by enhancing  
126 the adaptive immune response towards viral pathogens (reviewed by Yang and Li, 2020). This broad-  
127 spectrum “antiviral state” results in a slowed metabolism and the eventual apoptosis of infected cells, hence  
128 limiting viral spread (reviewed by Fritsch and Weichhart, 2016). Importantly, the potency of the type I IFN  
129 pathway is dependent on the length of dsRNA molecules, but sequence does not appear to influence this  
130 response (Kato *et al.*, 2008; Leonard *et al.*, 2008; DeWitte-Orr *et al.*, 2009; Poynter and DeWitte-Orr,  
131 2018). As a result, the IFN pathway is recognized to induce powerful, yet non-specific, inhibition of viral  
132 replication.

133 In contrast, RNA interference (RNAi) is the main antiviral mechanism used when invertebrate cells  
134 encounter viral dsRNA. In the early stages of this response, RNAi appears very similar to the IFN pathway.  
135 Long extracellular dsRNA is brought into the cell either by SR-As into endosomes or transported directly  
136 into the cytoplasm via the molecular channel SID-1 (Ulvila *et al.*, 2006; Winston *et al.*, 2002). Similar to  
137 its mammalian homolog SIDT2, SID-1 in invertebrates transports dsRNA in a length-dependent and  
138 sequence-independent manner (Li *et al.*, 2015). Once within the cytosol, the dsRNA is cleaved into small  
139 interfering RNAs (siRNAs) by Dicer, a dsRNA-specific RNase-III-type endonuclease (reviewed by  
140 Maillard *et al.*, 2019). A single strand of each siRNA duplex is then bound by Argonaute (Ago), which  
141 combines with accessory proteins to form the RNA-induced silencing complex (RISC, reviewed by  
142 Maillard *et al.*, 2019). The siRNA-loaded RISC acts to render complementary target RNAs useless, either  
143 by mediating their cleavage or by remaining bound to prevent their translation (reviewed by van den Berg

144 *et al.*, 2008). Contrary to the IFN pathway, the RNAi pathway is heavily dependent on complementarity of  
145 sequence between the siRNA and the cytosolic target RNA.

146 Though mammalian cells have been shown to possess all the cellular machinery needed for RNAi,  
147 it is currently believed that these organisms only use the IFN pathway to combat viral invaders (reviewed  
148 by Schuster *et al.*, 2019). Mammalian cells can undergo RNAi with long dsRNA (dsRNAi) when IFN-  
149 incompetent or when IFN competent and transfected with siRNA (Elbashir *et al.*, 2001; Billy *et al.*, 2001;  
150 Yang *et al.*, 2001; Paddison *et al.*, 2002; Maillard *et al.*, 2013; Maillard *et al.*, 2016). When mammalian  
151 cells have normal IFN function and are exposed to long dsRNA, it has been shown that the IFN pathway  
152 actively inhibits RNAi (Seo *et al.*, 2013; Van der Veen *et al.*, 2018). However, none of these studies soaked  
153 cells with long dsRNA at concentrations that were too low to induce the IFN response. Moreover, many of  
154 these studies either transfect cells with long dsRNA or use the TLR3 agonist, polyinosinic:polycytidylic  
155 acid (pIC, reviewed by Komal *et al.*, 2021). The use of pIC is an excellent tool for understanding the IFN  
156 pathway, but it is important to note that this molecule is not the same as naturally occurring dsRNA. It has  
157 no defined length, a preparation of pIC can range from 1.5 kb to 8 kb and contains complimentary strands  
158 of inosines and cytosines, that would be not found in nature, to produce a dsRNA helix (Scadden, 2007).  
159 Thus, the results from both pIC and dsRNA transfection studies may not be indicative of the natural cellular  
160 responses to extracellular dsRNA, particularly at low concentrations. This suggests a fascinating possibility,  
161 where RNAi is the mechanism used by mammalian cells when dsRNA levels are too low to induce IFN.  
162 This *sentinel* activity could provide pre-emptive protection and/or clearance early in the course of infection  
163 when viral numbers are not yet high enough to warrant the costly use of the IFN pathway.

164 Since its discovery in 1998 by Fire and colleagues, scientists have been fascinated with the gene  
165 knockdown potential of RNAi. Yet, as described above, this sequence-specific knockdown did not seem  
166 possible in IFN-competent mammalian cells without the use of transfection agents. Moreover, the  
167 understanding of how cells respond to non-IFN inducing concentrations of dsRNA is completely absent  
168 from the literature. In the present study, we provide evidence that antiviral RNAi can be induced in  
169 mammalian cells by simply pre-soaking the cells with dsRNA at concentrations that are too low to induce  
170 IFN production. Remarkably, we were able to demonstrate this phenomenon in multiple mammalian cell  
171 types using several different dsRNA sequences to inhibit the infection of vesicular stomatitis virus  
172 expressing green fluorescent protein (VSV-GFP), as well as the human coronaviruses (CoV) HCoV-229E  
173 and SARS-CoV-2. Additionally, we reveal that this phenomenon is length-dependent and requires the  
174 presence of Dicer. Aside from the implications this work could have on developing novel antiviral/gene  
175 therapies, these results provide an explanation as to why the mammalian lineage retained all the necessary  
176 machinery for RNAi and why several mammalian viruses have devoted parts of their valuable genetic  
177 material to inhibit this pathway (Wang *et al.*, 2006; Yang *et al.*, 2013; Qui *et al.*, 2020).

## 178 179 **2. Results:**

### 180 *3.1 The interferon response in cells soaked with long dsRNA versus pIC*

181 Because RNAi appears to be masked by the interferon response, it was crucial to identify which  
182 concentration of soaked dsRNA would not induce the IFN pathway. When gene expression of IFN $\beta$  and  
183 CXCL10 was measured 26h after cells were exposed to 700 bp GFP dsRNA (0.5  $\mu$ g/mL and 10  $\mu$ g/mL) or  
184 10  $\mu$ g/mL of HMW pIC, only the pIC condition appeared to induce the IFN response (**Figure 1**). The THF  
185 and SNB75 cell lines were initially selected for this study to explore whether both a normalized cell line  
186 (THF) and an “abnormal” cancerous cell line (SNB75) would be capable of long dsRNAi while being IFN  
187 competent. In THF, the gene expression of IFN $\beta$  increased only in the pIC exposure condition, but due to  
188 variability this was not significantly different from the other conditions (**Figure 1Ai**). When SNB75 was  
189 stimulated with these dsRNA and pIC doses, only the pIC treatment was able to induce significant  
190 upregulation of IFN $\beta$  gene expression (**Figure 1Bi**). Because IFN $\beta$  gene expression is known to be quite  
191 rapid and short-lived, the more persistent ISG, CXCL10, was also measured. In both THF and SNB75,

192 CXCL10 gene expression was only observed to significantly increase when cells were soaked with pIC  
193 (**Figures 1Aii** and **1Bii**). Neither dsRNA concentration appeared to induce significant upregulation of IFN $\beta$   
194 or CXCL10 when compared to the unstimulated control (**Figure 1**). When comparing the molar amounts,  
195 5.1 nM of pIC (average length of 3000 bp) and 21.6 nM of 700 bp dsRNA was added to the cells. This  
196 means that four times more dsRNA molecules were added to each cell when compared to the number of  
197 pIC molecules. Furthermore, pIC is over four times longer than the dsRNA molecules used here, so it is  
198 difficult to compare efficacy of IFN induction between these molecules. As such, pIC should only be  
199 considered a positive control in this experiment.

### 200 *3.2 Soaking with long dsRNA does not negatively impact the viability of mammalian cells*

201 To validate that soaking with long dsRNA does not negatively influence the health status of THF,  
202 SNB75 or MRC5, cell survival and metabolism were both measured. Following 24h exposure to a range of  
203 700 bp GFP dsRNA concentrations, cellular metabolism was shown to significantly increase at only the  
204 highest dsRNA concentration assessed, 800 ng/mL (**Figure 2A**). The toxicity experiments did not use  
205 dsRNA concentrations greater than 800 ng/mL because higher concentrations were unnecessary to see  
206 RNAi effects. The significant increase in cellular metabolism at 800 ng/mL was observed in THF (**Figure**  
207 **2Ai**), SNB75 (**Figure 2Aii**) and MRC5 (**Figure 2Aiii**) when compared to the 0 ng/mL control. Meanwhile,  
208 membrane integrity was shown to not be influenced at any of the dsRNA concentrations assessed in all  
209 three of the cell lines studied (**Figure 2B**). None of the dsRNA treated cells presented values significantly  
210 lower than the control cells, for both Alamar Blue and CFDA, indicating none of the dsRNAs treated were  
211 cytotoxic.

### 212 *3.3 Long dsRNAi can only be stimulated by dsRNA lengths of 400 bp or greater*

213 It was initially observed that pre-soaking cells with 500 ng/mL of 700 bp GFP dsRNA for 2h could  
214 stimulate protection towards VSV-GFP in both THF and SNB75 (**Figure 3**). Cell viability (**Figure 2**) and  
215 IFN induction by dsRNA (**Figure 1**) were both measured using 700bp long GFP dsRNA; however, the  
216 length of dsRNA capable of inducing dsRNAi required optimization. It was observed that dsRNA of 300  
217 bp and shorter could not significantly induce knockdown of VSV-GFP in THF cells (**Figure 3A**). In the  
218 cancerous SNB75 cell line, the dsRNA length cut-off was less definitive as both 300 and 400 bp did not  
219 significantly differ from either the control condition or those inducing significant knockdown (**Figure 3B**).  
220 The appearance of the VSV-GFP infected THF following the dsRNA treatments revealed whether  
221 knockdown was occurring as the level of fluorescence is directly related to viral load (**Figure 3C**).

### 222 *3.4 Mammalian cells soaked with long dsRNA of viral genes can induce viral knockdown*

223 Because GFP is not a naturally occurring gene found in viruses, the ability of dsRNA encoding viral  
224 gene sequences to stimulate dsRNAi was explored next. Soaking mammalian cells with viral gene specific  
225 dsRNA was shown to induce knockdown of corresponding viruses (**Figure 4**). When THF and SNB75 were  
226 pre-soaked with 500 ng/mL of 700 bp dsRNA synthesized to the N and M protein genes of VSV, significant  
227 knockdown was observed when compared to the non-sequence matched controls of mCherry and Beta-lac  
228 (**Figure 4A** and **4B**). Additionally, when a mixture of 250 ng/mL N protein dsRNA and 250 ng/mL M  
229 protein dsRNA was used to pre-soak THF cells, significant knockdown was still observed but was  
230 comparable to when only 500 ng/mL of either dsRNA was used (**Figure 4A**). For SNB75, this mixture pre-  
231 exposure was not observed to be significantly different to the control (**Figure 4B**). When MRC5 cells were  
232 pre-soaked with 500 ng/mL of 700 bp dsRNA synthesized to the RdRp, N protein, M protein and spike  
233 protein genes of HCoV-229E, significant reduction of viral particle production was observed for all  
234 exposures except for the RdRp dsRNA (**Figure 4C**). In Calu-3 cells, significant reduction in viral  
235 replication was observed after pre-treatment with 1000 ng/mL of SARS-CoV-2 N protein dsRNA when  
236 compared to both the virus alone control and the mis-matched mCherry dsRNA control (**Figure 4D**).  
237 However, no significant viral inhibition was observed when Calu-3 cells were pre-treated with 1000 ng/mL  
238 of SARS-CoV-2 M protein dsRNA (**Figure 4D**).

### 239 *3.5 Knockdown via dsRNA soaking is also observed in human pBECs*

240 In addition to the immortalized cell lines described above, the knockdown capability of pre-soaking  
241 cells with long dsRNA was also explored in primary pBEC cultures (**Figure 5**). An image of the pBECs  
242 after growth in culture for 28 days (**Figure 5A**). Significant knockdown of VSV-GFP was observed when  
243 pBECs were pre-treated with 500 ng/mL of dsRNA to the N protein of the virus when compared to the  
244 unmatched mCherry control (**Figure 5B**). Similar viral knockdown was also observed when the pBECs  
245 were pre-soaked with HCoV-229E M protein dsRNA which resulted in significant knockdown of HCoV-  
246 229E when compared to the mCherry control (**Figure 5C**). As a comparison it was also shown that soaking  
247 pBECs with 50 µg/mL of pIC also induced antiviral protection (**Figure 5C**). Indeed the level of protection  
248 provided by pIC was comparable to that provided by M protein encoding dsRNA ( $p = 0.1053442$ ).

### 249 *3.6 Soaking cells with siRNA did not induce viral knockdown*

250 When both THF and SNB75 cells were pre-soaked with GFP siRNA, TCID<sub>50</sub> levels of VSV-GFP were  
251 comparable to the unstimulated control and to the mis-matched long dsRNA mCherry control (**Figure 6Ai**  
252 and **6Bi**). Meanwhile, soaking these cells with 700 bp GFP dsRNA was again shown to induce significant  
253 knockdown of the VSV-GFP virus (**Figure 6Ai** and **6Bi**). This result was not due to inefficacy of the siRNA  
254 molecules as transfecting THF and SNB75 with the GFP siRNA induced significant knockdown when  
255 compared to transfection with the negative control siRNA (**Figure 6Aii** and **6Bii**). At the timepoint tested  
256 the knockdown of VSV-GFP by GFP siRNA is similar to that by 700 bp GFP dsRNA.

### 257 *3.7 Long, synthetic combination dsRNA molecules can inhibit VSV-GFP via multiple gene knockdown*

258 Combination dsRNA molecules were synthesized to test whether multiple VSV genes could be knocked  
259 down when 700 bp of dsRNA contained sequences for two different viral genes. **Figure 7A** is a schematic  
260 of the three different combination dsRNA molecules that were synthesized for this study. When THF cells  
261 were pre-treated with 500 ng/mL of each combination dsRNA molecule and the mCherry unmatched  
262 sequence control, only the three combination molecules were able to induce significant knockdown of VSV-  
263 GFP (**Figure 7Bi**). When measuring gene expression, only the 5'N-3'M molecule was able to induce  
264 significant knockdown of both the VSV N protein and M protein genes (**Figure 7Bii** and **7Biii**). When THF  
265 cells were pre-exposed to 1000 ng/mL of the combination dsRNA molecules and the mCherry control, it  
266 was observed again that only the three combination molecules induced significant knockdown of VSV-  
267 GFP (**Figure 7Ci**). Through pre-soaking with 1000 ng/mL, only the 5'N-3'M molecule induced significant  
268 knockdown of the VSV N protein gene (**Figure 7Cii**), but both 5'N-3'M and the N-M Alt molecules were  
269 able to induce significant knockdown of the VSV M protein gene (**Figure Ciii**).

### 270 *3.8 Dicer1 is a required component for the viral knockdown stimulated via cell soaking with dsRNA*

271 Knockdown of VSV-GFP was also obtained in the mouse MSC cell line that contains functional Dicer1  
272 when pre-soaked with long dsRNA containing N protein sequence for 2h prior to infection (**Figure 8A**). In  
273 comparison, when using the matching cell line that was Dicer1-defective, the significant decrease in viral  
274 knockdown was abolished (**Figure 8B**).

275

## 276 **3. Discussion:**

277 It is well established that transfecting and/or soaking vertebrate cells with long dsRNA or pIC, the  
278 IFN pathway will be stimulated (Alexopoulou *et al.*, 2001; Hemmi *et al.*, 2004; DeWitte-Orr *et al.*, 2009;  
279 De Waele *et al.*, 2017). However, little to no research has explored what the lower limit is for stimulating  
280 this IFN response through cell soaking. One study by Hägele and colleagues (2009) revealed that soaking  
281 murine cells with low concentrations of pIC (0.1-3 µg/mL) did not stimulate protein production of IFNβ  
282 and CXCL10. However, when the cells were transfected with these low doses of pIC, a significant increase  
283 was observed for both IFNβ and CXCL10 protein production (Hägele *et al.*, 2009). In the present study, we  
284 soaked human cells with 10 µg/mL of pIC and were successfully able to stimulate the gene expression of  
285 IFNβ and the ISG, CXCL10. Furthermore, we observed that the long dsRNA concentrations used in the  
286 present study did not induce the expression of these genes in both THF and SNB75. For the fibroblast cells

287 used, IFN $\beta$  would be anticipated to be the primary IFN produced in response to dsRNA (Li *et al.*, 2018).  
288 However, in glioblastoma cells, variations in IFN competence have been reported (Dick and Hubbell, 1987;  
289 Imaizumi *et al.*, 2014; De Waele *et al.*, 2021). When previously explored in multiple glioblastoma cell  
290 lines, pIC was shown to modestly induce IFN $\beta$  expression but significantly induced ISG (ISG15 and  
291 CXCL10) expression in some of these cultures (Wollmann *et al.*, 2007). When taken together, the results  
292 presented here for IFN stimulation via cell soaking are comparable to what has been reported previously in  
293 the literature.

294 Numerous studies have shown that exposing mammalian cells to dsRNA, pIC and/or viral infection  
295 hinders cellular metabolism (reviewed by Nellimarla and Mossman, 2014). However, most of these studies  
296 explore the impact of IFN-inducing concentrations, which would be expected to reduce metabolism through  
297 induction of the antiviral state (reviewed by Fritsch and Weichart, 2016). The results presented here provide  
298 evidence that soaking cells with concentrations of dsRNA that are too low to induce IFN does influence  
299 cellular metabolism. Surprisingly, as this concentration increases (while still being too low to induce IFN),  
300 we observed a significant, *increase* in cellular metabolism. This could be due to low level stimulation of  
301 PAMPs by dsRNA, which has been previously observed to enhance the metabolism of immune cells  
302 (human dendritic cells)(Everts *et al.*, 2014). The non-immune cells used in the present study can be  
303 stimulated by PAMPs and act as important sentinels for microbial infections, including those of viral origin  
304 (reviewed by Bautista-Hernández *et al.*, 2017). Thus, soaking cells with concentrations of dsRNA that do  
305 not induce IFN can stimulate metabolic rate through activation of IFN-independent innate antiviral  
306 processes within the cell.

307 Unless transfection is used, the literature supports that the RNAi pathway can only be induced if  
308 the original dsRNA molecule meets a certain length requirement. This length dependence was observed in  
309 the current study but has also been shown previously in various invertebrate models. The impact of dsRNA  
310 length on RNAi efficiency was recently explored in the Colorado potato beetle (He *et al.*, 2020). Though  
311 the beetles were exposed through ingestion of dsRNA expressing potato plants rather than soaking, it was  
312 shown that 200 bp or greater was required to induce a robust RNAi response (He *et al.*, 2020). A similar  
313 observation was observed when *Caenorhabditis elegans* was injected with long dsRNA. The length  
314 requirement for efficient knockdown was smaller in this example, at 50 to 100 bp (Parrish *et al.*, 2000).  
315 When explored further, it was revealed that the minimal length of dsRNA required for efficient RNA uptake  
316 by *C. elegans* SID-1 is 50 bp (Feinberg and Hunter, 2003; Li *et al.*, 2015). Importantly, increasing the length  
317 of the dsRNA molecules has been shown to enhance the observed knockdown through RNAi. When  
318 soaking *Drosophila* S2 cells with 700 bp dsRNA, 95-99% knockdown of the target protein was observed  
319 (Clemens *et al.*, 2000). Further study with S2 cells revealed that there was a clear length-dependence when  
320 soaking the cells with luciferase dsRNA that was not observed when transfecting them (Saleh *et al.*, 2006).  
321 Though significant knockdown was still observed when soaking with shorter lengths, 200 bp and greater  
322 were found to be much more effective at inducing luciferase knockdown (Saleh *et al.*, 2006). Because there  
323 is no concern of stimulating the IFN response in invertebrate cells, concentration may also play a role that  
324 cannot be explored in IFN-competent mammalian cells. This may provide an explanation as to why the  
325 length requirement (~300-400 bp and greater) observed in the present study was greater than those  
326 described using invertebrate cells. It is also possible that the size specificity of SID-1 includes smaller  
327 dsRNA molecules when compared to SIDT2. Additionally, because the SIDT2 channel has a higher binding  
328 affinity for dsRNA lengths ranging from 300-700 bp (Li *et al.*, 2015), this also supports its involvement  
329 here wherein knockdown was only achievable in THF and SNB75 using dsRNA lengths of 300-400 bp and  
330 greater.

331 Inhibition of viral infection through pre-stimulation of the RNAi pathway is not a novel concept  
332 and has been deemed successful against multiple mammalian viruses (Gitlin *et al.*, 2002; Wheeler *et al.*,  
333 2013). In fact, higher efficiency has been reported when using siRNAs that are specific for certain viral

334 genes over others, similarly to what was observed in the present study when using long dsRNA. When  
335 mammalian MDCK cells were pre-transfected for 8h with siRNA matching influenza viral genes of NP  
336 (nucleocapsid) and PA (component of RNA transcriptase), greater viral inhibition was observed when  
337 compared to siRNA developed for the genes of the M (matrix) and certain PB1 complexes (component of  
338 RNA transcriptase, Ge *et al.*, 2003). Moreover, when the same siRNAs were used in chicken embryos, only  
339 those that were very effective in the MDCK cells had protective effects *in vivo* (Ge *et al.*, 2003). When  
340 exploring the use of siRNA for combatting COVID-19, Wu and Luo (2021) reported 50% inhibition rates  
341 in 24h when targeting the structural Spike, N and M protein genes of SARS-CoV-2 that were overexpressed  
342 in human epithelial cells. These results have also been replicated in live animal trials. In an *in vivo* trial,  
343 mice were injected with lentiviruses containing siRNA that targeted either the L (polymerase) or N  
344 (nucleocapsid) protein of the rabies virus (RV). It was found that targeting the structural N protein provided  
345 62% protection to RV infected mice while no protection was observed when the L protein was the target  
346 (Singh *et al.*, 2014). Based on these previous results, it appears that the type of virus, and likely, variances  
347 in replication processes, play a role in which target genes have higher efficiency for RNAi knockdown.  
348 When exploring a rhabdovirus and two coronaviruses in the current study, pre-soaking with long dsRNA  
349 matching structural genes (N, M and spike proteins) was observed to be more successful than those  
350 associated with the viral transcriptional machinery (RdRp). A systematic study of each gene, including  
351 sequences within each gene, is needed in future studies to better understand what sequences are optimal  
352 targets for suppressing virus replication via dsRNAi.

353 As treatments that stimulate dsRNAi towards a single viral gene were successful, so simultaneous  
354 inhibition of multiple viral genes would be anticipated to enhance this effect. Combination treatments with  
355 siRNAs have shown promise in the suppression of various viral pathogens. When siRNAs that targeted  
356 both the G (glycoprotein) and the N protein genes of rabies virus was expressed in mammalian cells using  
357 a single cassette, an 87% reduction of the target virus was observed (Meshram *et al.*, 2013). It should be  
358 noted that individual sequences offered an 85% reduction in virus titres. Similarly, when rat fibroblast cells  
359 were exposed to combination siRNAs targeting both the Immediate-early-2 and DNA polymerase genes, a  
360 significant reduction in associated mRNAs and cytopathic effects was observed following infection with a  
361 novel rat Cytomegalovirus (Balakrishnan *et al.*, 2020). This siRNA combination inhibition has also been  
362 explored *in vivo* using both rhesus monkeys and macaques. SiRNA combinations targeting multiple genes  
363 of the Zaire Ebola virus (ZEBOV) provided 66% protection in the rhesus monkeys and 100% protection in  
364 macaques to lethal doses of ZEBOV when this treatment was administered in stable nucleic acid lipid  
365 particles (Geisbert *et al.*, 2010). Due to the greater length of long dsRNA when compared to their siRNA  
366 counterparts, it is possible to have multiple viral genes sequences present in a single molecule. In theory,  
367 this could induce knockdown of multiple viruses or multiple viral genes to inhibit infection, all without the  
368 requirement of transfection or creation of multiple dsRNA fragments. When this was explored for the first  
369 time in the present study, three combination molecules for the VSV N and M protein were shown to  
370 significantly knockdown viral titers when cells were soaked with the long dsRNA. However, qRT-PCR  
371 analysis revealed that only one of these molecules (5'N-3'M) was able to significantly reduce mRNA levels  
372 of both viral genes. Though mRNA degradation is often associated with the knockdown observed during  
373 RNAi, it is important to recognize that the RISC complex can bind to complimentary mRNAs and in doing  
374 so, repress translation (reviewed by van den Berg *et al.*, 2008). As a result, mRNA expression may not  
375 decrease but the associated protein levels would be reduced (Aleman *et al.*, 2007; Ma *et al.*, 2013). This  
376 provides an explanation as to why viral titers decreased, but mRNA levels were not always significantly  
377 reduced.

378 One of the defining mechanisms within the RNAi pathway is the cleavage of long dsRNAs into  
379 siRNAs by Dicer proteins. In both vertebrates and invertebrates, functional Dicer has been shown to be a  
380 necessity for the sequence-specific knockdown associated with RNAi (Bernstein *et al.*, 2001; Ketting *et al.*,



2001; Zhang *et al.*, 2002; Sakurai *et al.*, 2011). We confirmed this in mammalian cells as only mouse MSCs with functional Dicer were able to induce significant knockdown of viral titers when pre-soaked with long, sequence-matched dsRNA. The role of Dicer in inhibiting viral infection has been explored in mammalian cells, but viral replication has only been modestly affected in Dicer knockouts (Matskevich and Moelling, 2007; Bogerd *et al.*, 2014). Notably, these cells were not pre-treated with sequence-specific dsRNA prior to these infections. Based on the results of the present study, it appears that pre-soaking cells with low doses of dsRNA can provide sequence-matched protection against complimentary viral pathogens. Perhaps cells will default to RNAi when viral levels are not high enough to stimulate the IFN pathway. Aside from the data presented, this is also supported by evidence from numerous viral pathogens that specifically inhibit various components of the RNAi pathway, including Dicer. (Wang *et al.*, 2006; Qui *et al.*, 2020). To successfully establish infection when low levels of virus particles are present within the cell, perhaps it is critical for viruses to overcome the initial antiviral response via dsRNAi. This initial RNAi based disruption of viral mRNA could represent a constant, sentinel-like antiviral mechanism in mammalian cells. In this context mammalian cells would mount an RNAi based inhibition of viral mRNA at lower levels of circulating viral dsRNA, without initiating the energy consuming IFN response.

The results of the present study indicate several unique findings. Firstly, this is the first time in mammalian cells that RNAi has been observed through the natural uptake of sequence-specific dsRNA. This indicates that it may be possible to develop antiviral therapies involving long dsRNAs that do not involve costly transfection agents or stimulation of the damaging IFN response. Second, this viral inhibition was observed to be length-dependent, as only dsRNA that was 300-400 bp in length or greater would induce knockdown. This strongly implies a molecular channel such as SIDT2, although this was not explicitly confirmed in our study. Finally, the success of combination dsRNA constructs suggest that it may be possible to target either multiple genes within a single virus, genes originating from more than one virus or possibly those from one virus along with associated host proteins. Moreover, we were able to provide evidence that the observed viral inhibition was due to RNAi as Dicer1 knockouts could not induce this response. Confirming that pre-stimulation of RNAi in mammalian cells will induce protection against a variety of viral pathogens could have important implications for the development of novel antiviral therapies.

#### 4. Materials and Methods:

##### 4.1 Immortal Cell Maintenance

The telomerase-immortalized human fibroblast cell line, THF, was received as a generous gift from Dr. Victor DeFilippis of Oregon Health and Science University. The THF cells were maintained in Dulbecco's modified eagle medium (DMEM, Corning). The human glioblastoma cell line, SNB75, was obtained as part of the NCI-60 panel. The SNB75 cells were cultured in Roswell Park Memorial Institute (RPMI)-1640 medium (Corning). Two human embryonic lung cell lines, MRC-5 (CCL-171) and HEL-299 (CCL-137) were obtained from the American Type Culture Collection (ATCC). The MRC-5 cells were propagated in Eagle's Minimum Essential Medium (EMEM, Corning) while the HEL-299 cells were cultured in DMEM (Corning). The Dicer1 positive murine mesenchymal stem cell (MSC) line (Dicer1 f/f, CRL-3220) and the Dicer1 KO MSC line (Dicer1 -/-, CRL-3221) were obtained from the ATCC. Both mouse cell lines were cultured in Minimum Essential Medium (MEM) Alpha (Gibco). The media used for the above cell lines were supplemented with 10% fetal bovine serum (FBS, Seradigm) and 1% penicillin-streptomycin (P/S, Sigma). The lung adenocarcinoma cell line, Calu-3 (HTB-55), and the green monkey kidney epithelial cell line, Vero E6 (CRL-1586), were also obtained from ATCC. Vero E6 cells were cultured in DMEM supplemented with 10% FBS, 1x L-glutamine and 1% p/s. The Calu-3 cells were regularly cultured in MEM Alpha medium (Corning) supplemented with 10% FBS, 1% P/S and 1% HEPES. All cell lines were grown in vented T75 flasks (Falcon) at 37°C with 5% CO<sub>2</sub>.

## 428 4.2 Viruses

### 429 4.2.1 Viral Propagation

430 The Indiana serotype of Vesicular Stomatitis Virus (VSV-GFP) contains a GFP gene incorporated  
431 between the viral G and L genes (Dalton and Rose, 2001). As a result, cells infected with VSV-GFP  
432 fluoresce green. In the present study, VSV-GFP was propagated on monolayers of HEL-299. Virus  
433 infections were performed in DMEM containing 10% FBS and 1% P/S at 37°C with 5% CO<sub>2</sub>. Virus-  
434 containing media was cleared of cellular debris by centrifugation at 4,000 g for 4 min followed by filtration  
435 through a 0.45 µm filter. The filtered supernatant was aliquoted and stored at -80°C until ready to be  
436 quantified.

437 HCoV-229E was purchased from ATCC (VR-740) and subsequently propagated on monolayers of  
438 MRC5 cells. Viral infections were performed in EMEM medium containing 2% FBS and 1% P/S at 37°C  
439 with 5% CO<sub>2</sub>. After two days, virus-containing media was cleared at 4,000 g and filtered through a 0.45  
440 µm filter. The filtered supernatant was aliquoted and stored at -80°C until ready to be quantified. The  
441 second HCoV used in this study, SARS-CoV-2 isolate SB3, was propagated on Vero E6 cells as previously  
442 described by Banerjee *et al.* (2020). All SARS-CoV-2 infections were performed at a designated BSL-3 lab  
443 in accordance with guidelines from McMaster University.

### 444 4.2.2 Tissue Culture Infectious Dose (TCID<sub>50</sub>)

445 The cell lines described above for viral propagation were seeded in 96-well plates (1.5 x 10<sup>4</sup> cells/well)  
446 and were used to titer their respective viruses by TCID<sub>50</sub>. Following overnight adherence, all wells received  
447 100 µL of fresh 10% FBS media. For VSV-GFP, the supernatants of interest were serially diluted 1:5 in  
448 basal DMEM media. With HCoV-229E, the supernatants of interest were serially diluted 1:10 in basal  
449 EMEM media. For each sample dilution, 10 µL was added to eight wells of a 96-well plate for VSV-GFP  
450 and six wells for HCoV-229E. Plates were then either incubated at 37°C (VSV-GFP) or 33°C (HCoV-  
451 229E) at 5% CO<sub>2</sub>. At three (VSV-GFP) or seven (HCoV-229E) days post-infection, wells were scored by  
452 the presence of cytopathic effects (CPE) and viral titers were calculated using the Reed and Meusch  
453 method to obtain the TCID<sub>50</sub>/mL (Reed & Muensch, 1938).

## 454 4.3 Synthesis of dsRNA molecules

455 Genes of interest were amplified using forward and reverse primers that contained T7 promoters. The  
456 primer sets and their associated templates are outlined in **Table 1**. The DNA products were amplified by  
457 PCR using 10 ng of appropriate template (**Table 1**), 2X GoTaq colorless master mix (Promega), 0.5 µM  
458 of both forward and reverse primers (**Table 1**, Sigma Aldrich), and nuclease free water to a final volume  
459 of 50 µL. The following protocol was carried out in a Bio-Rad T100 thermocycler: 98°C – 5 min, 34 cycles  
460 of 98°C - 10s, 50°C - 10s, 72°C - 50s, followed by 72°C - 5min. The resulting DNA amplicons with T7  
461 promoters on both DNA strands were purified using a QIAquick PCR purification kit (Qiagen). The purified  
462 product was then used in the MEGAScript RNAi Kit (Invitrogen) as per the manufacturer's instructions to  
463 produce dsRNA. To confirm primer specificity, 100 ng of all PCR amplicons and the final dsRNA product  
464 were separated on 1% agarose gels containing 1% GelGreen (Biotium Inc.).

465

## 466 4.4 Testing for induction of the antiviral interferon response

### 467 4.4.1 RNA Extraction

468 In a 24-well plate, either THF or SNB75 were seeded at a density of 5.0 x 10<sup>4</sup> cells/well. Following  
469 overnight adherence, the media was replaced before exposure to either a DPBS control, 0.5 µg/mL of long  
470 dsRNA, 10 µg/mL of long dsRNA, or 10 µg/mL of high molecular weight (HMW)  
471 polyinosinic:polycytidylic acid (pIC) all diluted in full growth media. Cells were exposed to these  
472 treatments for 26h before the media was removed and the test wells were washed once with DPBS. Cells  
473 were then collected in TRIzol (Invitrogen) and total RNA was extracted according to the manufacturer's

474 instructions. RNA was then treated with Turbo DNA-free™ Kit (Invitrogen) to remove any contaminating  
475 genomic DNA. Complementary DNA (cDNA) was synthesized from 500 ng of purified RNA using the  
476 iScript™ cDNA Synthesis Kit (Bio-Rad) following protocols provided by the manufacturer.

#### 477 4.4.2 qRT-PCR

478 The expression of IFN related genes (IFN $\beta$  and CXCL10) was measured by quantitative real-time  
479 polymerase chain reaction (qRT-PCR). IFN $\beta$  was chosen because it is frequently the first type I IFN  
480 induced following dsRNA treatment, particularly in fibroblasts (Bolivar *et al.*, 2018; Li *et al.*, 2018).  
481 CXCL10 was chosen as the representative ISG because its expression levels are very high in the presence  
482 of IFNs (Buttmann *et al.*, 2007; Antonelli *et al.*, 2010). All PCR reactions contained: 2  $\mu$ L of diluted  
483 cDNA, 2x SsoFast EvaGreen Supermix (Bio-Rad), 0.2 mM of forward primer (Sigma Aldrich), 0.2 mM  
484 of reverse primer (Sigma Aldrich) and nuclease-free water to a total volume of 10  $\mu$ L (Fisher Scientific).  
485 The sequences and accession number for each primer set are outlined in **Table 2**. The qRT-PCR reactions  
486 were performed using the CFX Connect Real-Time PCR Detection System (Bio-Rad). The program used  
487 for all reactions was: 98°C denaturation for 3 min, followed by 40 cycles of 98°C for 5 sec, 55°C for 10  
488 sec, and 95°C for 10 sec. A melting curve was completed from 65°C to 95°C with a read every 5 sec.  
489 Product specificity was determined through single PCR melting peaks. All qRT-PCR data was analyzed  
490 using the  $\Delta\Delta$ Ct method and is presented as the average of four experimental replicates with the standard  
491 error of the mean (SEM). Specifically, gene expression was normalized to the housekeeping gene ( $\beta$ -  
492 actin) and presented as fold changes over the control group.

493

#### 494 4.5 Cell viability to dsRNA

495 To determine whether different dsRNA concentrations could influence the survival of THF, MRC5 and  
496 SNB75, two fluorescent indicator dyes, Alamar Blue (AB, Invitrogen) and 5-carboxyfluorescein diacetate  
497 acetoxymethyl ester (CFDA-AM, Invitrogen), were used. Together these dyes provide an excellent  
498 indication of cell viability as both cellular metabolism (AB) and membrane integrity (CFDA-AM) are  
499 measured (Dayeh *et al.*, 2003). THF and SNB75 cells were seeded at a density of  $1 \times 10^4$  cells/well in a 96-  
500 well tissue culture plate and allowed to adhere overnight at 37°C with 5% CO<sub>2</sub>. All cell monolayers were  
501 washed once with DPBS and then treated in eight-fold with a doubling dilution of dsRNA ranging from  
502 800 ng/mL to 3.13 ng/mL for 24h at 37°C with 5% CO<sub>2</sub> in normal growth media. Following incubation,  
503 each well was washed twice with DPBS before exposure to AB and CFDA-AM as described previously by  
504 Dayeh *et al.* (2003). Because two fluorescent dyes were used to test cell viability, the 96-well plate was  
505 read at an excitation of 530 nm and an emission of 590 nm for AB as well as an excitation of 485 nm and  
506 an emission of 528 nm for CFDA-AM. The reads were completed using a Synergy HT plate reader (BioTek  
507 Instruments). For each cell line analyzed, three independent experiments were performed.

508

#### 509 4.6 Stimulating viral inhibition via soaking with low doses of dsRNA

510 THF and SNB75 cells were seeded at a density of  $5.0 \times 10^4$  cells/well in a 24-well plate (Falcon).  
511 Following overnight adherence, the media in all test wells was changed to fresh media. The cells were then  
512 pre-treated for 2h with either a DPBS control, 500 ng/mL of 700 bp GFP dsRNA, or 500 ng/mL of 700 bp  
513 mCherry dsRNA at 37°C with 5% CO<sub>2</sub>. Pre-treatment for 2h was selected after completing a time course  
514 experiment to determine the optimal amount of time to pre-treat cells with dsRNA to induce viral  
515 knockdown (supplementary figure S1). All test wells were then exposed to VSV-GFP at a multiplicity of  
516 infection (MOI) of 0.1 and allowed to incubate for 24h at 37°C with 5% CO<sub>2</sub> before supernatants were  
517 collected for TCID<sub>50</sub> quantification as described above.

518

#### 519 4.7 Elucidating the role of sequence length in dsRNAi

520 To explore the impact that the dsRNA sequence length had on the observed viral knockdown, dsRNA  
521 was synthesized to GFP that ranged in size from 200 bp to 700 bp and tested for ability to induce  
522 knockdown. THF or SNB75 were seeded in a 24-well plate at a density of  $5.0 \times 10^4$  cells/well. Following  
523 overnight adherence followed by a media change, the cells were pre-treated for 2h with either a DPBS  
524 control, 500 ng/mL of mCherry dsRNA, or 500 ng/mL of GFP dsRNA at lengths of 200 bp, 300 bp, 400  
525 bp, 500 bp, 600 bp and 700 bp at 37°C with 5% CO<sub>2</sub>. All test wells were then exposed to VSV-GFP at an  
526 MOI of 0.1 and allowed to incubate for 24h at 37°C with 5% CO<sub>2</sub> before supernatants were collected for  
527 TCID50 quantification as described above.

528

#### 529 *4.8 Use of viral genes for dsRNAi*

##### 530 *4.8.1 VSV-GFP*

531 DsRNA was synthesized to the VSV viral genes of N protein and M protein as described above.  
532 Either THF or SNB75 were seeded in a 24-well plate at a density of  $5.0 \times 10^4$  cells/well. Following  
533 overnight adherence, the media in all test wells was changed to fresh media. The cells were then pre-  
534 treated for 2h with either a DPBS control, 500 ng/mL of VSV N protein dsRNA, 500 ng/mL of VSV M  
535 protein dsRNA, 500 ng/mL of mCherry dsRNA or a combination of 250 ng/mL of VSV N protein and  
536 250 ng/mL of VSV M protein (500 ng/mL total of dsRNA) at 37°C with 5% CO<sub>2</sub>. All test wells were then  
537 exposed to VSV-GFP at an MOI of 0.1 and allowed to incubate for 24h at 37°C with 5% CO<sub>2</sub> before  
538 supernatants were collected for TCID50 quantification as described above.

##### 539 *4.8.2 HCoV-229E*

540 DsRNA was synthesized for HCoV-229E viral genes of RdRp, Spike protein, N protein and M  
541 protein as described above. MRC5 cells were seeded in a 24-well plate at a density of  $7.5 \times 10^4$  cells/well.  
542 Following overnight adherence, the media in all test wells was changed to fresh media. The cells were  
543 then pre-treated for 2h with either a DPBS control, 500 ng/mL of 229E RdRp, 500 ng/mL of 229E Spike  
544 protein, 500 ng/mL of 229E N protein dsRNA, 500 ng/mL of 229E M protein dsRNA or 500 ng/mL of  
545 mCherry dsRNA at 37°C with 5% CO<sub>2</sub>. All test wells were then exposed to HCoV-229E at an MOI of  
546 0.02 and allowed to incubate for 24h at 37°C with 5% CO<sub>2</sub> before supernatants were collected for TCID50  
547 quantification as described above.

##### 548 *4.8.3 SARS-CoV-2*

549 DsRNA was synthesized for the SARS-CoV-2 viral genes, N protein and M protein, as described  
550 above. Calu-3 cells were seeded in a 12-well plate at a density of  $2.0 \times 10^5$  cells/well. Two days later, the  
551 media was replaced with fresh media. The cells were then pretreated for 2h with either 1000 ng/mL of  
552 mCherry dsRNA control, 1000 ng/mL of SARS-CoV-2 M protein dsRNA or 1000 ng/mL of SARS-CoV-  
553 2 N protein dsRNA at 37°C with 5% CO<sub>2</sub>. Following pre-treatment, the cells were exposed to SARS-  
554 CoV-2 at an MOI of 1.0 for 1h, washed twice with sterile 1x PBS, and the dsRNA added back to the  
555 appropriate wells. After 24h, total RNA isolation was performed using the RNeasy Mini Kit (Qiagen)  
556 according to the manufacturer's protocol. SARS-CoV-2 specific genome levels were measured by qPCR  
557 using SsoFast EvaGreen supermix (Bio-Rad) according to manufacturer's protocol.

558

#### 559 *4.9 dsRNAi in human primary Bronchial/Tracheal Epithelial Cells (pBECs)*

##### 560 *4.9.1 Culture of human pBECs*

561 Normal human primary bronchial/tracheal epithelial cells (pBECs) were purchased from ATCC  
562 (PCS-300-010). The pBECs were transferred to six T25 flasks containing complete Airway Epithelial  
563 Cell medium (ATCC) and cells were incubated at 37°C with 5% CO<sub>2</sub> until they reached approximately  
564 80% confluence. Cells were then detached using 0.25% trypsin (Gibco) and transferred to 1 µm transwell  
565 permeable supports (Falcon) in a 24-well plate at a density of  $3.3 \times 10^4$  cells/insert (200 µL per insert).  
566 The basolateral side received 700 µL of complete Airway Epithelial Cell medium. Media changes were

567 made every 2d with the apical layer receiving 200  $\mu$ L and the basolateral layer receiving 700  $\mu$ L. Once  
568 the cells reached 100% confluence, the media was aspirated from the transwell which was then transported  
569 to a new 24-well plate and 600  $\mu$ L of PneumaCult™ALI Maintenance medium (STEMCELL  
570 Technologies) was added to the basolateral side. Cells were left to grow for 28d with basolateral media  
571 changes occurring every 2d. After approximately 7d, apical washes using 200  $\mu$ L of DPBS were  
572 performed every week to clear the cells of mucus production. After 28d the cells were used for  
573 experiments.

#### 574 4.9.2 Soaking with long dsRNA

575 Transwells containing the 28-day cultured pBECs were washed once by incubation with with 200  
576  $\mu$ L of sterile DPBS for 40 min. The transwells were then moved to a new 24-well plate wherein each test  
577 well contained 600  $\mu$ L of fresh PneumaCult™-ALI Complete Base Medium (STEMCELL Technologies)  
578 for the basolateral side. The DPBS was removed from the apical side of the test transwells and were then  
579 exposed to either media alone, 500 ng/mL of dsRNA (VSV N protein, HCoV-229E M protein or mCherry  
580 as a control) or 50  $\mu$ g/mL of pIC for 2h at 37°C with 5% CO<sub>2</sub>. Following the 2h incubation, appropriate  
581 test wells were exposed to either VSV-GFP (MOI = 0.1) or HCoV-229E (MOI = 0.1) and incubated for  
582 24h before the supernatants were collected and the TCID50 was quantified as described above.

583

#### 584 4.10 Soaking versus transfection with siRNA

585 In order to directly compare the effects of soaking with long dsRNA or siRNA on virus inhibition,  
586 THF and SNB75 cells were seeded in 24-well plates at a density of  $5.0 \times 10^4$  cells/well. Following overnight  
587 adherence and a fresh media change, cells were exposed to either a DPBS control, 2 nM of 700 bp GFP  
588 dsRNA, 2 nM of GFP Silencer® siRNA (Ambion) or 2 nM of the negative control Silencer® siRNA  
589 (Ambion) for 2h at 37°C with 5% CO<sub>2</sub>. Cells were exposed to nanomolar concentrations (equivalent to 500  
590 ng/mL of 700 bp dsRNA) to ensure that the same number of dsRNA and siRNA molecules were added in  
591 each treatment group. Following this incubation, wells were exposed to VSV-GFP at an MOI of 0.1 and  
592 incubated for 24h at 37°C with 5% CO<sub>2</sub> before supernatants were collected for TCID50 quantification as  
593 described above.

594 For validation that the siRNA molecules were functional and capable of inducing knockdown, the  
595 siRNA molecules were transfected into SNB75 and THF cells and subsequent viral numbers were  
596 quantified. THF and SNB75 cells were seeded 24-well plates at a density of  $5.0 \times 10^4$  cells/well. Following  
597 overnight adherence and a fresh media change, cells were 10 nM of GFP Silencer® siRNA (Ambion) or 10  
598 nM of the negative control Silencer® siRNA (Ambion) was transfected into the cells using Lipofectamine  
599 RNAiMAX (Invitrogen). Cells were transfected with 10nM siRNA as recommended by the manufacturer.  
600 Following a 24h incubation at 37°C with 5% CO<sub>2</sub>, wells were washed twice with DPBS and then exposed  
601 to VSV-GFP at an MOI of 0.1 and incubated for 24h at 37°C with 5% CO<sub>2</sub> before supernatants were  
602 collected and the TCID50 was quantified as described above.

603

#### 604 4.11 Inducing viral inhibition using combination dsRNA molecules that target multiple viral genes

605 To determine whether combination dsRNA could induce viral knockdown via inhibition of multiple  
606 viral genes at once, THF cells were seeded at a density of  $5.0 \times 10^4$  cells/well in a 24-well plate. Following  
607 overnight adherence, the media in all test wells was changed to fresh media. The cells were then pre-treated  
608 for 2h with either a DPBS control, 500 ng/mL of 5'N-3'M (first 350 bp are VSV N protein and last 350 bp  
609 are VSV M protein), 500 ng/mL of 5'M-3'N (first 350 bp are VSV M protein and last 350 bp are VSV N  
610 protein), 500 ng/mL of N-M Alt (50 bp of VSV N protein and 50 bp of VSV M protein in alternating fashion  
611 for 700 bp), or 500 ng/mL mCherry dsRNA at 37°C with 5% CO<sub>2</sub>. All test wells were then exposed to  
612 VSV-GFP at an MOI of 0.1 and allowed to incubate for 24h at 37°C with 5% CO<sub>2</sub> before supernatants were  
613 collected for TCID50 quantification as described above. The cell monolayers were collected in Trizol so

614 that total RNA could be extracted and cDNA was synthesized as described above in *section 2.4*. The  
615 expression of VSV genes (M and N protein) was measured by qRT-PCR using the same method as outlined  
616 above in *section 2.4*. The sequences and accession number for the primer sets used here are outlined in  
617 **Table 2**. The VSV gene expression of cells exposed to the 5'M-3'N molecule was not measured due to the  
618 small size of the M protein gene which made it impossible to develop qPCR primers that did not amplify a  
619 region of the M-N dsRNA that was used to soak the cells.

620

#### 621 *4.12 Dicer knockout studies*

622 For successful knockdown, the RNAi pathway requires the use of Dicer to cleave viral RNAs into  
623 siRNAs. To provide evidence that the knockdown observed here was due to RNAi, a Dicer1 knockout  
624 mouse MSC cell line (Dicer1 *-/-*) was used along with its corresponding functional Dicer1 cell line (Dicer1  
625 *f/f*). For each experiment, both the knockout and functional Dicer MSC cell lines were seeded at a density  
626 of  $5.0 \times 10^4$  cells/well in a 24-well plate. Following overnight adherence, the media in all test wells was  
627 changed to fresh media. Both cell types were then pre-soaked for 2h with either a DPBS control, 500 ng/mL  
628 of VSV N protein dsRNA, or 500 ng/mL of mCherry dsRNA at 37°C with 5% CO<sub>2</sub>. All test wells were  
629 then exposed to VSV-GFP at an MOI of 0.1 and allowed to incubate for 24h at 37°C with 5% CO<sub>2</sub> before  
630 supernatants were collected for TCID<sub>50</sub> quantification as described above.

631

#### 632 *4.13 Statistical analyses*

633 All data sets were tested for a normal distribution (Shapiro-Wilk) and homogeneity of variance  
634 (Levene's) using R and RStudio (R Core Team, 2014; RStudio Team, 2015). Further statistical analyses  
635 were also completed using R and RStudio. For the viability, VSV gene expression and viral titer data, a  
636 one-way analysis of variance (ANOVA) was completed followed by a Tukey's post-hoc test to compare  
637 between all exposure conditions. When determining whether the IFN genes were upregulated, a one-way  
638 ANOVA was completed followed by a Dunnett's multiple comparisons post-hoc test to detect significant  
639 differences from the control condition. With the siRNA transfection data, a two-tailed unpaired t-test was  
640 completed. For all statistical analyses, a p-value less than 0.05 was considered significant. All data is  
641 presented as the average of experimental replicates + SEM.

642

#### 643 **Acknowledgements:**

644 The authors would like to acknowledge Dr. Tamiru Alkie for his help with establishing the primary  
645 bronchial epithelial/tracheal cell cultures.

646

#### 647 **Author Contributions:**

648 RJ performed the experiments involving SARS-CoV-2 and the associated analyses. KM contributed to  
649 experimental design and funding of the SARS-CoV-2 work. SS performed the remaining experiments, all  
650 of the associated analyses, contributed to experimental design and wrote the first draft of the manuscript.  
651 SDO contributed to experimental design, funding of the project, and writing of the manuscript. All authors  
652 contributed to manuscript revisions and approved the final submitted version.

653

#### 654 **Conflict of Interest:**

655 The authors declare that this research was conducted in the absence of any commercial or financial  
656 relationships that could be interpreted as a potential conflict of interest.

657

658

659

660

661 **References:**

- 662 1. Alemán LM, Doench J, Sharp PA (2007) Comparison of siRNA-induced off-target RNA and protein  
663 effects. *RNA*, 13:385-395
- 664 2. Alexopoulou L, Holt AC, Medzhitov R, Flavell RA (2001) Recognition of double-stranded RNA and  
665 activation of NF- $\kappa$ B by toll-like receptor 3. *Nature*, 413:732-738
- 666 3. Antonelli A, Ferrari SM, Fallahi P, Ghiri E, Crescioli C, Romagnani P, *et al.* (2010) Interferon-alpha,  
667 -beta and -gamma induce CXCL9 and CXCL10 secretion by human thyrocytes: modulation by  
668 peroxisome proliferator-activated receptor-gamma agonists. *Cytokine*, 50:260-267
- 669 4. Balakrishnan KN, Abdullah AA, Bala JA, Jesse FFA, Abdullah CAC, Noordin MM, *et al.* (2020)  
670 Multiple gene targeting siRNAs for down regulation of Immediate Early-2 (Ie2) and DNA polymerase  
671 genes mediated inhibition of novel rat Cytomegalovirus (strain All-03). *Virology Journal*, doi:  
672 10.1186/s12985-020-01436-5
- 673 5. Banerjee A, Nasir JA, Budylowski P, Yip L, Aftanas P, Christie N, *et al.* (2020) Isolation, sequence,  
674 infectivity and replication kinetics of severe acute respiratory syndrome coronavirus 2. *Emerging*  
675 *Infectious Disease*, 26:2054-2063
- 676 6. Bernstein E, Caudy AA, Hammond SM, Hannon GJ (2001) Role for a bidentate ribonuclease in the  
677 initiation step of RNA interference. *Nature*, 409:363-366
- 678 7. Billy E, Brondani V, Zhang H, Müller U, Filipowicz W (2001) Specific interference with gene  
679 expression induced by long, double-stranded RNA in mouse embryonal teratocarcinoma cell lines.  
680 *PNAS*, 98:14428-14433
- 681 8. Bogerd HP, Skalsky RL, Kennedy EM, Furuse Y, Whisnant AW, Flores O, *et al.* (2014) Replication  
682 of many human viruses is refractory to inhibition by endogenous cellular microRNAs. *Journal of*  
683 *Virology*, doi: 10.1128/JVI.00985-14
- 684 9. Bolívar S, Anfossi R, Humeres C, Vivar R, Boza P, Muñoz C, *et al.* (2018) IFN- $\beta$  plays both pro- and  
685 anti-inflammatory roles in the rat cardiac fibroblast through differential STAT protein activation.  
686 *Frontiers in Pharmacology*, doi: 10.3389/fphar.2018.01368
- 687 10. Borden EC, Sen GC, Uze G, Silverman RH, Ransohoff RM, Foster GR, Stark GR (2007) Interferons  
688 at age 50: past, current and future impact on biomedicine. *Nature Reviews Drug Discovery*, 6:975-990
- 689 11. Buttmann M, Berberich-Siebelt F, Serfling E, Rieckmann P (2007) Interferon-beta is a potent inducer  
690 of interferon regulatory factor-1/2-dependent IP-10/CXCL10 expression in primary human endothelial  
691 cells. *Journal of Vascular Research*, 44:51-60
- 692 12. Cheon HJ, Borden EC, Stark GR (2014) Interferons and their stimulated genes in the tumor  
693 microenvironment. *Seminars Oncology*, 41:156-173.
- 694 13. Clemens JC, Worby CA, Simonson-Leff N, Muda M, Maehama T, Hemmings BA, *et al.* (2000) Use  
695 of double-stranded RNA interference in *Drosophila* cell lines to dissect signal transduction pathways.  
696 *PNAS*, 97:6499-6503.
- 697 14. Dalton KP, Rose JK (2001) Vesicular stomatitis virus glycoprotein containing the entire green  
698 fluorescent protein on its cytoplasmic domain is incorporated efficiently into virus particles. *Virology*,  
699 279:414-421.
- 700 15. De Waele J, Marcq E, Van Audenaerde JRM, Van Loenhout J, Deben C, Zwaenepoel K, *et al.* (2018)  
701 Poly(I:C) primes primary human glioblastoma cells for an immune response invigorated by PD-L1  
702 blockade. *Oncoimmunology*, doi: 10.1080/2162402X.2017.1407899
- 703 16. De Waele J, Verhezen T, Van der Heijden S, Berneman ZN, Peeters M, Lardon F, *et al.* (2021) A  
704 systematic review on poly(I:C) and poly-ICLC in glioblastoma: adjuvants coordinating the unlocking  
705 of immunotherapy. *Journal of Experimental & Clinical Cancer Research*, doi: 10.1186/s13046-021-  
706 02017-2
- 707 17. DeWitte-Orr SJ, Collins SE, Bauer CMT, Bowdish DM, Mossman KL (2010) An accessory to the  
708 'trinity': SR-As are essential pathogen sensors of extracellular dsRNA, mediating entry and leading to  
709 subsequent type I IFN responses. *PLoS Pathogens*, doi: 10.1371/journal.ppat.1000829

- 710 18. DeWitte-Orr SJ, Mehta DR, Collins SE, Suthar M, Gale MJ, Mossman KL (2009) Long dsRNA induces  
711 an antiviral response independent of IRF3, IPS-1 and IFN. *The Journal of Immunology*, doi:  
712 10.4049/jimmunol.0900867
- 713 19. DeWitte-Orr SJ, Mossman KL (2010) DsRNA and the innate antiviral immune response. *Future*  
714 *Virology*, doi: <https://doi.org/10.2217/fvl.10.18>
- 715 20. Dick RS, Hubbell HR (1987) Sensitivities of human glioma cell lines to interferons and double-stranded  
716 RNAs individually and in synergistic combinations. *Journal of Neuro-Oncology*, 5:331-338
- 717 21. Elbashir SM, Harborth J, Lendeckel W, Yalcin A, Weber K, Tuschli T (2001) Duplexes of 21-nucleotide  
718 RNAs mediate RNA interference in cultured mammalian cells. *Nature*, 411:494-498
- 719 22. Everts B, Amiel E, Huang SC-C, Smith AM, Chang C-H, Lam WY, *et al.* (2014) TLR-driven early  
720 glycolytic reprogramming via the kinases TBK1-IKKe supports the anabolic demands of dendritic cell  
721 activation. *Nature Immunology*, 15:323-332
- 722 23. Feinberg EH, Hunter CP (2003) Transport of dsRNA into cells by the transmembrane protein SID-1.  
723 *Science*, 301:1545-1547
- 724 24. Fire A, Albertson D, Harrison SW, Moerman DG (1991) Production of antisense RNA leads to effective  
725 and specific gene expression in *C. elegans* muscle. *Development*, 113:503-514.
- 726 25. Fire A, Xu S, Montgomery MK, Kostas SA, Driver SE, Mello CC (1998) Potent and specific genetic  
727 interference by double-stranded RNA in *Caenorhabditis elegans*. *Nature*, 391:806-811.
- 728 26. Fritsch SD, Weichhart T (2016) Effects of interferons and viruses on metabolism. *Frontiers in*  
729 *Immunology*, doi: 10.3389/fimmu.2016.00630
- 730 27. Ge Q, McManus MT, Nguyen T, Shen C-H, Sharp PA, Eisen HN, *et al.* (2003) RNA interference of  
731 influenza virus production by directly targeting mRNA for degradation and indirectly inhibiting all  
732 viral RNA transcription. *PNAS*, 100:2718-2723
- 733 28. Geisbert TW, Lee ACH, Robbins M, Geisbert JB, Honko AN, Sood V, *et al.* (2010) Postexposure  
734 protection of non-human primates against a lethal Ebola virus challenge with RNA interference: a  
735 proof-of-concept study. *The Lancet*, 375:1896-1905
- 736 29. Gitlin L, Karelsky S, Andino R (2002) Short interfering RNA confers intracellular antiviral immunity  
737 in human cells. *Nature*, 418:430-434
- 738 30. Guo S, Kemphues KJ (1995) *par-1*, a gene required for establishing polarity in *C. elegans* embryos,  
739 encodes a putative Ser-Thr kinase that is asymmetrically distributed. *Cell*, 81:611-620.
- 740 31. Hägele H, Allam R, Pawar RD, Anders H-J (2009) Double-stranded RNA activates type I interferon  
741 secretion in glomerular endothelial cells via retinoic acid-inducible gene (RIG)-1. *Nephrology Dialysis*  
742 *Transplantation*, 24:3312-3318.
- 743 32. He W, Xu W, Xu L, Fu K, Guo W, Bock R, *et al.* (2020) Length-dependent accumulation of double-  
744 stranded RNAs in plastids affects RNA interference efficiency in the Colorado potato beetle. *Journal*  
745 *of Experimental Botany*, 71:2670-2677.
- 746 33. Hemmi H, Takeuchi O, Sato S, Yamamoto M, Kaisho T, Sanjo H, *et al.* (2004) The roles of two I $\kappa$ B  
747 kinase-related kinases in lipopolysaccharide and double stranded RNA signaling and viral infection.  
748 *The Journal of Experimental Medicine*, 199:1641-1650
- 749 34. Bautista-Hernández LA, Gómez-Olivares JL, Buentello-Volante B, Bautista-de Lucio VM (2017)  
750 Fibroblasts: the unknown sentinels eliciting immune responses against microorganisms. *European*  
751 *Journal of Microbiology and Immunology*, doi: 10.1556/1886.2017.00009
- 752 35. Imaizumi T, Numata A, Yano C, Yoshida H, Meng P, Hayakari R, *et al.* (2014) ISG54 and ISG56 are  
753 induced by TLR3 signaling in U373MG human astrocytoma cells: possible involvement in CXCL10  
754 expression. *Neuroscience Research*, 84:34-42
- 755 36. Jensen S, Thomsen AR (2012) Sensing of RNA viruses: a review of innate immune receptors involved  
756 in recognizing RNA virus invasion. *Journal of Virology*, 86:2900-2910
- 757 37. Kato H, Takeuchi O, Mikamo-Satoh E, Hirai R, Kawai T, Matsushita K, *et al.* (2008) Length-dependent  
758 recognition of double-stranded ribonucleic acids by retinoic acid-inducible gene-I and melanoma  
759 differentiation-associated gene 5. *The Journal of Experimental Medicine*, 205:1601-1610



- 760 38. Ketting RF, Fischer SEJ, Bernstein E, Sijen T, Hannon GJ, Plasterk RHA (2001) Dicer functions in  
761 RNA interference and in synthesis of small RNA involved in developmental timing in *C. elegans*.  
762 *Genes & Development*, 15:2654-2659
- 763 39. Komal A, Noreen M, El-Kott AF (2021) TLR3 agonists: RGC100, ARNAX and poly-IC: a comparative  
764 review. *Imunologic Research*, 69:312-322.
- 765 40. Lee H-C, Chathuranga K, Lee J-S (2019) Intracellular sensing of viral genomes and viral evasion.  
766 *Experimental & Molecular Medicine*, 51:1-13.
- 767 41. Leonard JN, Ghirlando R, Askins J, Bell JK, Margulies DH, Davies DR, *et al.* (2008) The TLR3  
768 signaling complex forms by cooperative receptor dimerization. *PNAS*, 105:258-263
- 769 42. Li S, Gong M, Zhao F, Shao J, Xie Y, Zhang Y, Chang H (2018) Type I interferons: distinct biological  
770 activities and current applications for viral infection. *Cellular Physiology and Biochemistry*, 51:2377-  
771 2396.
- 772 43. Li W, Koutmou KS, Leahy DJ, Li M (2015) Systemic RNA interference deficiency-1 (SID-1)  
773 extracellular domain selectively binds long double-stranded RNA and is required for RNA transport by  
774 SID-1. *RNA*, 31:P18904-18913
- 775 44. Ma X, Kim E-J, Kook I, Ma F, Voshall A, Moriyama E, *et al.* (2013) Small interfering RNA-mediated  
776 translation alters ribosome sensitivity to inhibition by cycloheximide in *Chlamydomonas reinhardtii*<sup>[W]</sup>.  
777 *The Plant Cell*, 25:985-998
- 778 45. Machitani M, Sakurai F, Wakabayashi K, Tomita K, Tachibana M, Mizuguchi H (2016) Dicer function  
779 as an antiviral system against human adenoviruses via cleavage of adenovirus-encoded noncoding  
780 RNA. *Scientific Reports*, doi: 10.1038/srep27598
- 781 46. Maillard PV, Ciaudo C, Marchais A, Li Y, Jay F, Ding SW, *et al.* (2013) Antiviral RNA interference  
782 in mammalian cells. *Science*, 342:235-238
- 783 47. Maillard PV, Van der Veen AG, Deddouche-Grass S, Rogers NC, Merits A, Reis e Sousa C (2016)  
784 Inactivation of the type I interferon pathway reveals long double-stranded RNA-mediated RNA  
785 interference in mammalian cells. *The EMBO Journal*, 35:2505-2518
- 786 48. Maillard PV, Van der Veen AG, Poirier EZ, Reis e Sousa C (2019) Slicing and dicing viruses: antiviral  
787 RNA interference in mammals. *The EMBO Journal*, doi: 10.15252/embj.2018100941
- 788 49. Matskevich AA, Moelling K (2007) Dicer is involved in protection against influenza A virus infection.  
789 *Journal of General Virology*, doi: 10.1099/vir.0.83103-0
- 790 50. Matsumoto M, Funami K, Tateatsu M, Azuma M, Seya T (2014) Assessment of the toll-like receptor  
791 3 pathway in endosomal signaling. *Methods in Enzymology*, 535:149-165
- 792 51. Meshram CD, Singh NK, Sonwane AA, Pawar SS, Mishra BP, Chaturvedi VK, *et al.* (2013) Evaluation  
793 of single and dual siRNAs targeting rabies virus glycoprotein and nucleoprotein genes for inhibition of  
794 virus multiplication *in vitro*. *Archives of Virology*, doi: 10.1007/s00705-013-1738-z
- 795 52. Nellimarla S, Mossman KL (2014) Extracellular dsRNA: its function and mechanism of cellular uptake.  
796 *Journal of Interferon and Cytokine Research*, doi: 10.1089/jir.2014.0002
- 797 53. Nguyen TA, Smith BRC, Tate MD, Belz GT, Barrios MH, Elgass KD, *et al.* (2017) SIDT2 transports  
798 extracellular dsRNA into the cytoplasm for innate immune recognition. *Immunity*, 47:498-509
- 799 54. Paddison PJ, Caudy AA, Hannon GJ (2002) Stable suppression of gene expression by RNAi in  
800 mammalian cells. *PNAS*, 99:1443-1448
- 801 55. Parrish S, Fleenor J, Xu S, Mello C, Fire A (2000) Functional anatomy of a dsRNA trigger: differential  
802 requirement for the two trigger strands in RNA interference. *Molecular Cell*, 6:1077-1087
- 803 56. Poynter SJ, DeWitte-Orr SJ (2018) Understanding viral dsRNA-mediated innate immune responses at  
804 the cellular level using a rainbow trout model. *Frontiers Immunology*, doi: 10.3389/fimmu.2018.00829
- 805 57. Qui Y, Xu Y-P, Wang M, Miao M, Zhou H, Xu J, *et al.* (2020) Flavivirus induces and antagonizes  
806 antiviral RNA interference in both mammals and mosquitoes. *Science Advances*, doi:  
807 10.1126/sciadv.aax7989
- 808 58. Reed LJ, Muensch H (1938) A simple method of estimating fifty per cent endpoints. *American Journal*  
809 *of Epidemiology*, 27:493-497.

- 810 59. Rehwinkel J, Gack GU (2020) RIG-I-like receptors: their regulation and roles in RNA sensing. *Nature*  
811 *Reviews Immunology*, 20:537-551
- 812 60. Rich A, Davies DR (1956) A new two-stranded helical structure: polyadenylic acid and polyuridylic  
813 acid. *The Journal of the American Chemical Society*, 78:3548.
- 814 61. Sakurai K, Amarzguioui M, Kim D-H, Alluin J, Heale B, Song M-S, *et al.* (2011) A role for human  
815 Dicer in pre-RISC loading of siRNAs. *Nucleic Acids Research*, 39:1510-1525
- 816 62. Saleh M-C, van Rij RP, Hekele A, Gillis A, Foley E, O'Farrell PH, *et al.* (2006) The endocytic pathway  
817 mediates cell entry of dsRNA to induce RNAi silencing. *Nature Cell Biology*, doi: 10.1038/ncb1439
- 818 63. Scadden ADJ (2007) Inosine-containing dsRNA binds a stress-granule-like complex and downregulates  
819 gene expression in *trans*. *Molecular Cell*, 28:491-500
- 820 64. Schuster S, Miesen P, van Rij RP (2019) Antiviral RNAi in insects and mammals: parallels and  
821 differences. *Viruses*, doi: 10.3390/v11050448
- 822 65. Seo GJ, Kincaid RP, Phanaksri T, Burke JM, Pare JM, Cox JE, *et al.* (2013) Reciprocal inhibition  
823 between intracellular antiviral signaling and the RNAi machinery in mammalian cells. *Cell Host and*  
824 *Microbe*, 14:435-445
- 825 66. Singh NK, Meshram CD, Sonwane AA, Dahiya SS, Pawar SS, Chaturvedi VK, *et al.* (2014) Protection  
826 of mice against lethal rabies virus challenge using short interfering RNAs (siRNAs) delivered through  
827 lentiviral vector. *Molecular Biotechnology*, doi: 10.1007/s12033-013-9685-1
- 828 67. Son KN, Liang Z, Lipton HL (2015) Double-stranded RNA is detected by immunofluorescence  
829 analysis in RNA and DNA virus infections, including those by negative-stranded RNA viruses. *Journal*  
830 *of Virology*, 89:9383-9392
- 831 68. Tatematsu M, Funami K, Seya T, Matsumoto M (2018) Extracellular RNA sensing by pattern  
832 recognition receptors. *Journal of Innate Immunity*, 10:398-406
- 833 69. Ulvila J, Parikka M, Kleino A, Sormunen R, Ezekowitz RA, Kocks C, Rämetsä M (2006) Double-  
834 stranded RNA is internalized by scavenger receptor-mediated endocytosis in *Drosophila* S2 cells.  
835 *Genomics, Proteomics, and Bioinformatics*, 281:P14370-14375
- 836 70. Van den Berg A, Mols J, Han J (2008) RISC-target interaction: cleavage and translational suppression.  
837 *Biochimica et Biophysica Acta*, 1779:668-677.
- 838 71. Van der Veen AG, Maillard PV, Schmidt JM, Lee SA, Deddouche-Grass S, Borg A, *et al.* (2018) The  
839 RIG-I-like receptor LGP2 inhibits Dicer-dependent processing of long double-stranded RNA and  
840 blocks RNA interference in mammalian cells. *The EMBO Journal*, doi: 10.15252/embj.201797479
- 841 72. Wang Y, Kato N, Jazag A, Dharel N, Otsuka M, Taniguchi H, *et al.* (2006) Hepatitis C virus core  
842 protein is a potent inhibitor of RNA silencing-based antiviral response. *Gastroenterology*, 130:883-892
- 843 73. Watson, J.D., and Crick, F.H.C. (1953) Molecular Structure of Nucleic Acids: A Structure for  
844 Deoxyribose Nucleic Acid. *Nature*, doi: 10.1038/171737a0
- 845 74. Weber F, Wagner V, Rasmussen SB, Hartmann R, Paludan SR (2006) Double-stranded RNA is  
846 produced by positive-strand RNA viruses and DNA viruses but not in detectable amounts by negative-  
847 sense RNA viruses. *Journal of Virology*, 80:5059-5064.
- 848 75. Wheeler LA, Vrbanac V, Trifonova R, Brehm MA, Gilboa-Geffen A, Tanno S, *et al.* (2013) Durable  
849 knockdown and protection from HIV transmission in humanized mice treated with gel-formulated CD4  
850 aptamer-siRNA chimeras. *Molecular Therapy*, 21:1378-1389
- 851 76. Winston WM, Molodowitch C, Hunter CP (2002) Systemic RNAi in *C. elegans* requires the putative  
852 transmembrane protein SID-1. *Science*, 295:2456-2459
- 853 77. Wollmann G, Robek MD, Van den Pol AN (2007) Variable deficiencies in the interferon response  
854 enhance susceptibility to vesicular stomatitis virus oncolytic actions in glioblastoma cells but not in  
855 normal human glial cells. *Journal of Virology*, 81:1479-1491
- 856 78. Wu R, Luo KQ (2021) Developing effective siRNAs to reduce the expression of key viral genes of  
857 COVID-19. *International Journal of Biological Sciences*, 17:1521-1529
- 858 79. Yang E, Li MMH (2020) All about the RNA: interferon-stimulated genes that interfere with viral RNA  
859 processes. *Frontiers in Immunology*, doi: 10.3389/fimmu.2020.605024

- 860 80. Yang L, Lu J, Han Y, Fan X, Ding S-W (2013) RNA interference functions as an antiviral immunity  
861 mechanism in mammals. *Science*, 342:231-234
- 862 81. Yang S, Tutton S, Pierce E, Yoon K (2001) Specific double-stranded RNA interference in  
863 undifferentiated mouse embryonic stem cells. *Molecular and Cellular Biology*, 21:7807-7816
- 864 82. Zhang H, Kolb FA, Brondani V, Billy E, Filipowicz W (2002) Human Dicer preferentially cleaves  
865 dsRNAs at their termini without a requirement for ATP. *The EMBO Journal*, 21:5875-5885
- 866

867

868

869

870

871

872

873

874

875

876

877

878

879

880

881

882

883

884

885

886

887

888

889

890 **Table 1:** Primers with underlined T7 promoter sequences that were used for amplification of genes of  
 891 interest for dsRNAi. The resulting DNA amplicons were then used for dsRNA synthesis. The resultant  
 892 dsRNA length and the original template DNA used for each primer set is also outlined.

| Primer               | dsRNA Length | Sequence (5' – 3')                                                                                                              | Template                           |
|----------------------|--------------|---------------------------------------------------------------------------------------------------------------------------------|------------------------------------|
| GFP                  | 700 bp       | F: <u>TAATACGACTCACTATAGGGGAGAGT</u> GAGCAAGGGCGAGGAGCTG<br>R: <u>TAATACGACTCACTATAGGGGAGATTACTTGTACAGCTCGTCCATGC</u>           | peGFP-C1 plasmid                   |
|                      | 600 bp       | F: <u>TAATACGACTCACTATAGGGGAGAGT</u> GAGCAAGGGCGAGGAGCTG<br>R: <u>TAATACGACTCACTATAGGGGAGAGG</u> TAGTGGTTGTCTGGGCAGCAG          |                                    |
|                      | 500 bp       | F: <u>TAATACGACTCACTATAGGGGAGAGT</u> GAGCAAGGGCGAGGAGCTG<br>R: <u>TAATACGACTCACTATAGGGGAGA</u> ATCTTGAAGTTCACCTTGATGCCG         |                                    |
|                      | 400 bp       | F: <u>TAATACGACTCACTATAGGGGAGAGT</u> GAGCAAGGGCGAGGAGCTG<br>R: <u>TAATACGACTCACTATAGGGGAGA</u> ATCTTGAAGTTCACCTTGATG            |                                    |
|                      | 300 bp       | F: <u>TAATACGACTCACTATAGGGGAGAGT</u> GAGCAAGGGCGAGGAGCTG<br>R: <u>TAATACGACTCACTATAGGGGAGAGA</u> AAGAAGATGGTGCCTCCTG            |                                    |
|                      | 200 bp       | F: <u>TAATACGACTCACTATAGGGGAGAGT</u> GAGCAAGGGCGAGGAGCTG<br>R: <u>TAATACGACTCACTATAGGGGAGAC</u> CGTAGGTCAGGTTGGTGCACG           |                                    |
| mCherry              | 700 bp       | F: <u>TAATACGACTCACTATAGGGGAGAGATA</u> ACATGGCCATCATCAAGG<br>R: <u>TAATACGACTCACTATAGGGGAGAC</u> CGGTGGAGTGGCGGCC               | pemCherry-C1 plasmid               |
| β-lac                | 750 bp       | F: <u>TAATACGACTCACTATAGGGGAGAT</u> GGGTGCACGAGTGGGTTACATCG<br>R: <u>TAATACGACTCACTATAGGGGAGAG</u> TACCAATGCTTAATCAGTGAGGC      | pFastBacHTA plasmid                |
| VSV M Protein        | 700 bp       | F: <u>TAATACGACTCACTATAGGGGAGAGATT</u> CTCGTCTGAAGGGGAAAGG<br>R: <u>TAATACGACTCACTATAGGGGAGAGA</u> ATTGTTTCAGAAGCTGGAAGCTAGAC   | cDNA from VSV infected cells       |
| VSV N Protein        | 700 bp       | F: <u>TAATACGACTCACTATAGGGGAGAT</u> CTGTTACAGTCAAGAGAATCATTG<br>R: <u>TAATACGACTCACTATAGGGGAGATT</u> GCAGAGGTGTCCAAATCT         |                                    |
| 229E M Protein       | 700 bp       | F: <u>TAATACGACTCACTATAGGGGAGAC</u> CAATCATATATGCACATAGACC<br>R: <u>TAATACGACTCACTATAGGGGAGAG</u> TGCTGTTGATGGTGGCTAA           | cDNA from HCoV-229E infected cells |
| 229E N Protein       | 700 bp       | F: <u>TAATACGACTCACTATAGGGGAGAG</u> TGCTGTTGATGGTGGCTAA<br>R: <u>TAATACGACTCACTATAGGGGAGATA</u> CCCAAGTGTGGATGGTCT              |                                    |
| 229E Spike Protein   | 700 bp       | F: <u>TAATACGACTCACTATAGGGGAGAAC</u> CTAGCTTGCCAGAAAGTG<br>R: <u>TAATACGACTCACTATAGGGGAGAA</u> AGCTGTCTGGAAGCACGAA              |                                    |
| 229E RdRp Protein    | 700 bp       | F: <u>TAATACGACTCACTATAGGGGAGAT</u> TATAGTTGCGTCATCGCCT<br>R: <u>TAATACGACTCACTATAGGGGAGAT</u> TAGGATCGTCAACATCGGC              |                                    |
| SARS-CoV-2 N Protein | 700 bp       | F: <u>TAATACGACTCACTATAGGGGAGATA</u> CTGCGTCTTGTTTACC<br>R: <u>TAATACGACTCACTATAGGGGAGA</u> ATTTCTTAGTGACAGTTTGGCCT             | IDT CoV N plasmid                  |
| SARS-CoV-2 M Protein | 700 bp       | F: <u>TAATACGACTCACTATAGGGGAGAT</u> GCCAGATTCCAACGGTA<br>R: <u>TAATACGACTCACTATAGGGGAGAC</u> CAATCCTGTAGCGACTG                  | SARS-CoV-2 M gBlock                |
| 5'N-M-3'             | 700 bp       | F: <u>TAATACGACTCACTATAGGGGAGAT</u> CTGTTACAGTCAAGAGAATCATTG<br>R: <u>TAATACGACTCACTATAGGGGAGAGA</u> ATTGTTTCAGAAGCTGGAAGCTAGAC | 5'N-M-3' gBlock                    |
| N-M Alt.             | 700 bp       | F: <u>TAATACGACTCACTATAGGGGAGAT</u> CTGTTACAGTCAAGAGAATCATTG<br>R: <u>TAATACGACTCACTATAGGGGAGAC</u> TGGAGTGGCCTTTAGATTAGAAG     | N-M Alt gBlock                     |

893  
 894  
 895  
 896  
 897  
 898  
 899  
 900  
 901  
 902  
 903

904 Table 2: Primers used for qRT-PCR analyses and for SARS-CoV-2 qPCR quantification.

905

| Primer         | Sequence (5'-3')                                                        | Genbank No. or Reference      | Application               |
|----------------|-------------------------------------------------------------------------|-------------------------------|---------------------------|
| $\beta$ -Actin | <b>F:</b> CTGGCACCCAGCACAATG<br><b>R:</b> CCGATCCACACGGAGTACTTG         | NM_001101.5                   | qRT-PCR                   |
| IFN $\beta$    | <b>F:</b> AAATCATGAGCAGTCTGCA<br><b>R:</b> AGGAGATCTTCAGTTTCGGAGG       | NM_002176.4                   |                           |
| CXCL10         | <b>F:</b> GAAAGCAGTTAGCAAGGAAAGG<br><b>R:</b> GACATATACTCCATGTAGGGAAGTG | XM_003832298.2                |                           |
| VSV N Protein  | <b>F:</b> CGACCTGGATCTTGAACC<br><b>R:</b> AGGCAGGGTTTTTGACG             | X04452.1                      |                           |
| VSV M Protein  | <b>F:</b> GTACATCGGAATGGCAGG<br><b>R:</b> TGAGCGTGATACTCGGG             | M15213.1                      |                           |
| SARS-CoV-2     | <b>F:</b> ATTGTTGATGAGCCTGAAG<br><b>R:</b> TTCGTAATCATCAGCTTG           | Banerjee <i>et al.</i> , 2020 | SARS-CoV-2 Quantification |

906

907

908

909

910

911

912

913

914

915

916

917

918

919

920

921

922

923

924

925

926 **Figure Legends:**

927 **Figure 1:** Type I IFN gene expression is not stimulated by soaking cells with low doses of dsRNA. Both  
928 THF (A) and SNB75 (B) cells were soaked with 700 bp dsRNA for 26h at concentrations of 0.5 µg/mL and  
929 10 µg/mL as well as with HMW pIC at a concentration of 10 µg/mL. Following treatment, transcript  
930 expression of *IFNβ* (i) and *CXCL10* (ii) was assessed via qRT-PCR analysis. All data were normalized to  
931 the reference gene (*β-Actin*) and expressed as a fold change over the control group where control expression  
932 was set to 1. Error bars represent +SEM, and represents the average of 3 independent replicates. A p-value  
933 of less than 0.001 is represented by a \*\*\* symbol while a p-value of less than 0.0001 is represented by a  
934 \*\*\*\* symbol when compared only to the control (Ctl) treatment.

935 **Figure 2:** Soaking cells with long dsRNA does not negatively influence cell viability. THF (i), SNB75 (ii)  
936 and MRC5 (iii) were soaked with 700 bp dsRNA for 26h at concentrations that ranged from 0 ng/mL to  
937 800 ng/mL. Cellular metabolism was measured using an Alamar Blue assay (A) and membrane integrity  
938 was measured using CFDA (B). Error bars represent +SEM, and each data point represents the average of  
939 3 independent experiments. A p-value of less than 0.05 was considered to be statistically significant. Error  
940 bars with different letters represent significantly different data.

941 **Figure 3:** Viral knockdown is observed when pre-soaking cells with sequence-specific long dsRNA and  
942 this response is length dependent. THF (A) and SNB75 (B) cells were pre-soaked with either sequence  
943 specific (GFP) dsRNA ranging from 200 bp to 700 bp in length, non-sequence specific (mCherry or beta-  
944 lac) dsRNA of 700 bp or DPBS as a control for 2h prior to 24h infection with VSV-GFP (MOI = 0.1).  
945 Appearance of the THF cells after treatments with dsRNA and VSV-GFP infection as observed under the  
946 fluorescent microscope at 50X magnification (C). Error bars represent +SEM, and each data point  
947 represents the average of 6 independent replicates. A p-value of less than 0.05 was considered to be  
948 statistically significant. Error bars with different letters represent significantly different data.

949 **Figure 4:** Soaking cells with long dsRNA of viral genes can induce knockdown of the complementary virus.  
950 Both THF (A) and SNB75 (B) cells were pre-soaked for 2h with either DPBS alone, 500 ng/mL of the mis-  
951 matched dsRNA controls (mCherry or Beta-lac), 500 ng/mL of VSV N protein dsRNA, 500 ng/mL of VSV  
952 M protein dsRNA or a mixture of 250 ng/mL N protein dsRNA with 250 ng/mL of M protein dsRNA before  
953 infection with VSV-GFP (MOI = 0.1) for 24h. MRC5 cells were pre-soaked for 2h with either DPBS alone,  
954 500 ng/mL of the mCherry mis-matched dsRNA sequence control or 500 ng/mL of dsRNA matching  
955 HCoV-229E sequences for either RdRp, M protein, N protein and the spike protein before 24h infection  
956 with HCoV-229E (MOI = 0.02) (C). Calu-3 cells were pre-soaked for 2h with either DPBS alone, 1000  
957 ng/mL of the mCherry mis-matched dsRNA sequence control or 1000 ng/mL of dsRNA matching SARS-  
958 CoV-2 sequences for either M protein and N protein prior to 24h infection with SARS-CoV-2 (MOI = 1.0)  
959 (D). Error bars represent +SEM, and each data point represents the average of 6 independent replicates. A  
960 p-value of less than 0.05 was considered to be statistically significant and different letters represent  
961 significant differences. For the SARS-CoV-2 data, a p-value of less than 0.01 is represented by a \*\* symbol  
962 and a p-value of less than 0.05 is represented by a \* symbol when compared only to the control treatment

963 **Figure 5:** Primary Bronchial Epithelial/Tracheal Cells (pBECs) pre-soaked with long dsRNA of viral genes  
964 inhibits infection with corresponding viruses. The pBECs were grown to confluence and were shown to  
965 exhibit characteristics indicative of epithelial/tracheal cells, including mucous production and cilia function  
966 (A). The pBECs were pre-soaked with either DPBS, 500 ng/mL of the mis-matched mCherry dsRNA  
967 control or 500 ng/mL of VSV N protein dsRNA before infection with VSV-GFP (MOI = 0.1) for 24h (B).  
968 The pBECs were also pre-treated with either DPBS, 50 µg/mL of HMW pIC, 500 ng/mL of the mis-matched  
969 mCherry dsRNA control or 500 ng/mL of HCoV-229E M protein dsRNA before infection with HCoV-

970 229E (MOI = 0.1) for 24h (**C**). Error bars represent +SEM, and each data point represents the average of 3  
971 independent replicates. A p-value of less than 0.05 was considered to be statistically significant. Error bars  
972 with different letters represent significantly different data.

973 Figure 6: Soaking is sufficient for long dsRNA-induced antiviral effects but not siRNA. THF (**Ai**) and  
974 SNB75 (**Bi**) were pre-soaked for 2h with either DPBS, 2 nM of long mCherry dsRNA, 2 nM of long GFP  
975 dsRNA or 2 nM of GFP siRNA prior to infection with VSV-GFP (MOI = 0.1) for 24h. To ensure that the  
976 siRNA was functional, THF (**Aii**) and SNB75 (**Bii**) cells were transfected with either 10 nM of GFP siRNA  
977 or 10 nM of the negative control siRNA for 24h prior to infection with VSV-GFP (MOI = 0.1) for 24h.  
978 Error bars represent +SEM, and each data point represents the average of 5 independent replicates. A p-  
979 value of less than 0.05 was considered to be statistically significant and different letters represent significant  
980 differences. For the transfection data, a p-value of less than 0.01 is represented by a \*\* symbol while less  
981 than 0.001 is represented by a \*\*\* symbol.

982 Figure 7: Combination dsRNA molecules can inhibit viruses through the knockdown of multiple viral  
983 genes. Three different 700 bp combination genes were synthesized using gBlocks referred to as 5'N-3'M,  
984 5'M-3'N and N-M Alt (**A**). THF cells were pre-soaked for 2h with DPBS or 500 ng/mL of either mCherry,  
985 5'N-3'M, 5'M-3'N or N-M Alt before being exposed to VSV-GFP (MOI = 0.1) for 24h (**Bi**). Following  
986 this treatment, cells were collected and RNA extracted so that gene expression of the VSV N protein gene  
987 (**Bii**) and M protein gene (**Biii**) could be measured by qRT-PCR. THF cells were also pre-soaked for 2h  
988 with DPBS or 1000 ng/mL of either mCherry, 5'N-3'M, 5'M-3'N or N-M Alt before being exposed to  
989 VSV-GFP (MOI = 0.1) for 24h (**Ci**). Following this treatment, cells were collected and RNA extracted so  
990 that gene expression of the VSV N protein gene (**Cii**) and M protein gene (**Ciii**) could be measured by qRT-  
991 PCR. Error bars represent +SEM. Each data point for the titer data represents the average of 6 independent  
992 replicates while the qRT-PCR data represents the average of 5 independent replicates. A p-value of less  
993 than 0.05 was considered to be statistically significant. Error bars with different letters represent  
994 significantly different data.

995 Figure 8: The observed viral inhibition by long dsRNA soaking is dependent on the presence of functional  
996 Dicer proteins. Mouse MSCs that had functional Dicer1 were pre-soaked for 2h with DPBS or 500 ng/mL  
997 of either mis-matched mCherry dsRNA or matched GFP dsRNA before infection with VSV-GFP (MOI =  
998 0.1) for 24h (**A**). The matching mouse MSC cell line that was a KO for Dicer1 were also pre-soaked for 2h  
999 with DPBS or 500 ng/mL of either mis-matched mCherry dsRNA or matched GFP dsRNA before infection  
1000 with VSV-GFP (MOI = 0.1) for 24h (**B**). Error bars represent +SEM, and each data point represents the  
1001 average of 6 independent replicates. A p-value of less than 0.05 was considered to be statistically  
1002 significant. Error bars with different letters represent significantly different data.

1003

1004

1005

1006

1007

1008

1009

1010

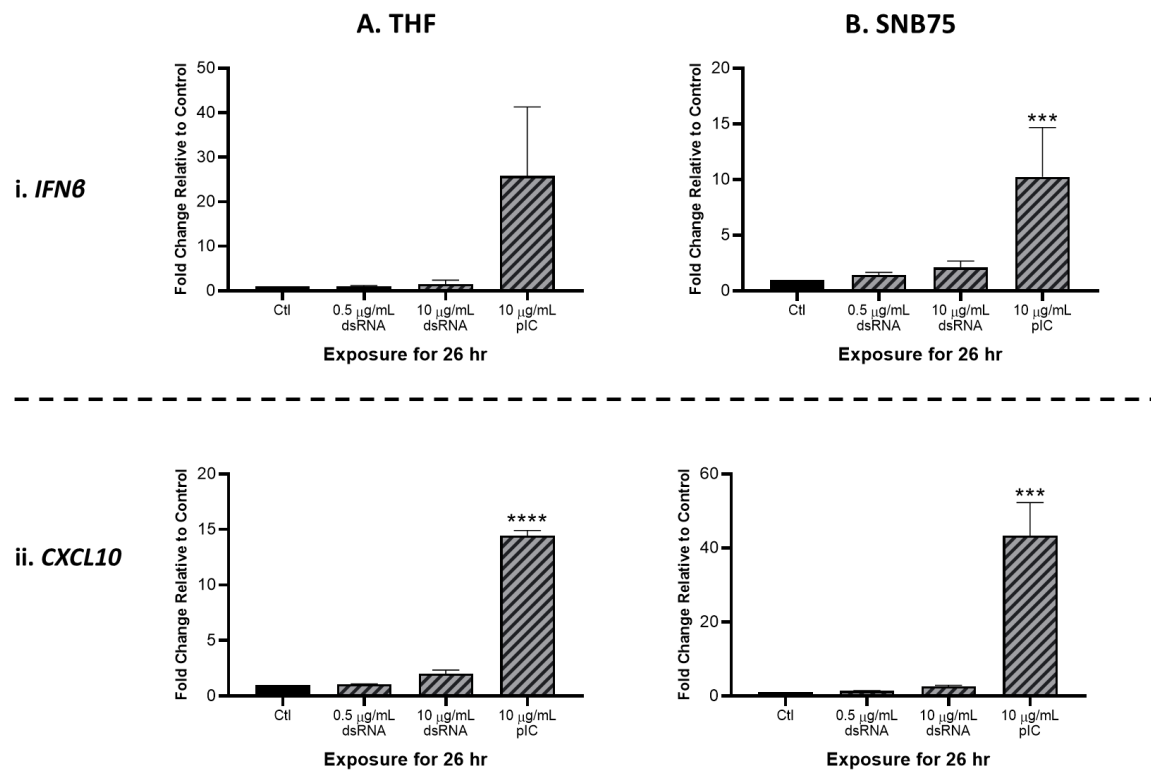

1011

1012

1013 Figure 1

1014

1015

1016

1017

1018

1019

1020

1021

1022

1023



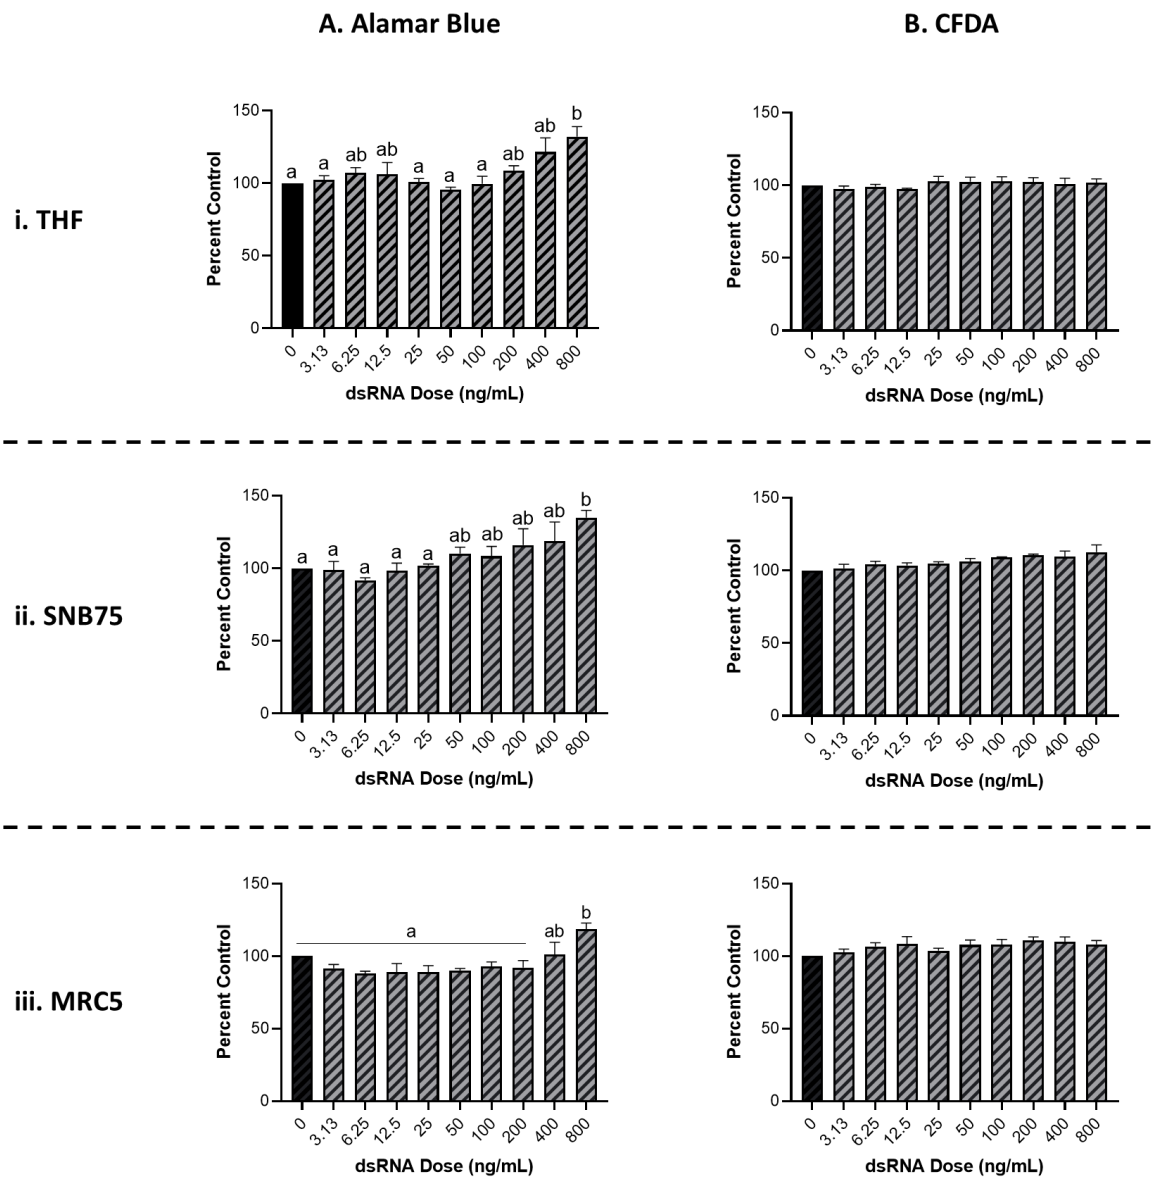

1024

1025

Figure 2

### A. THF

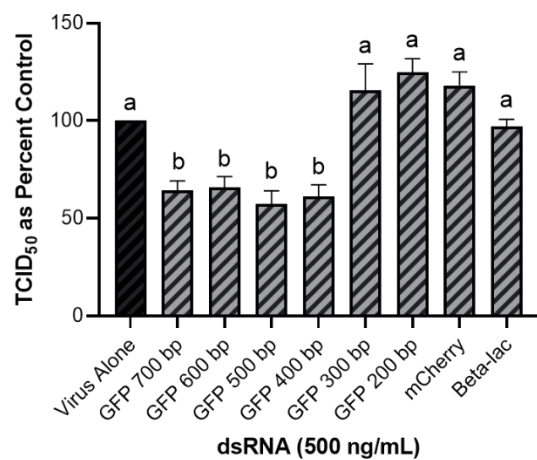

### B. SNB75

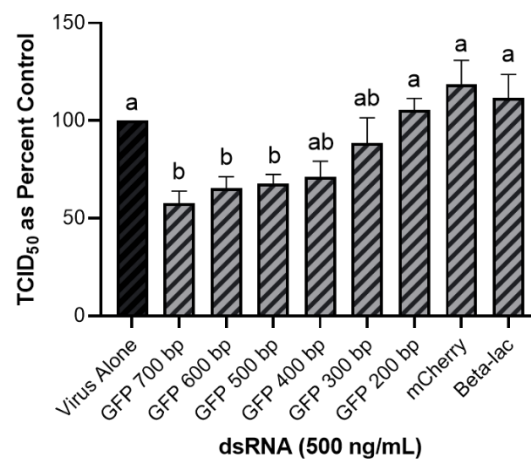

### C. Representative Images (THF)

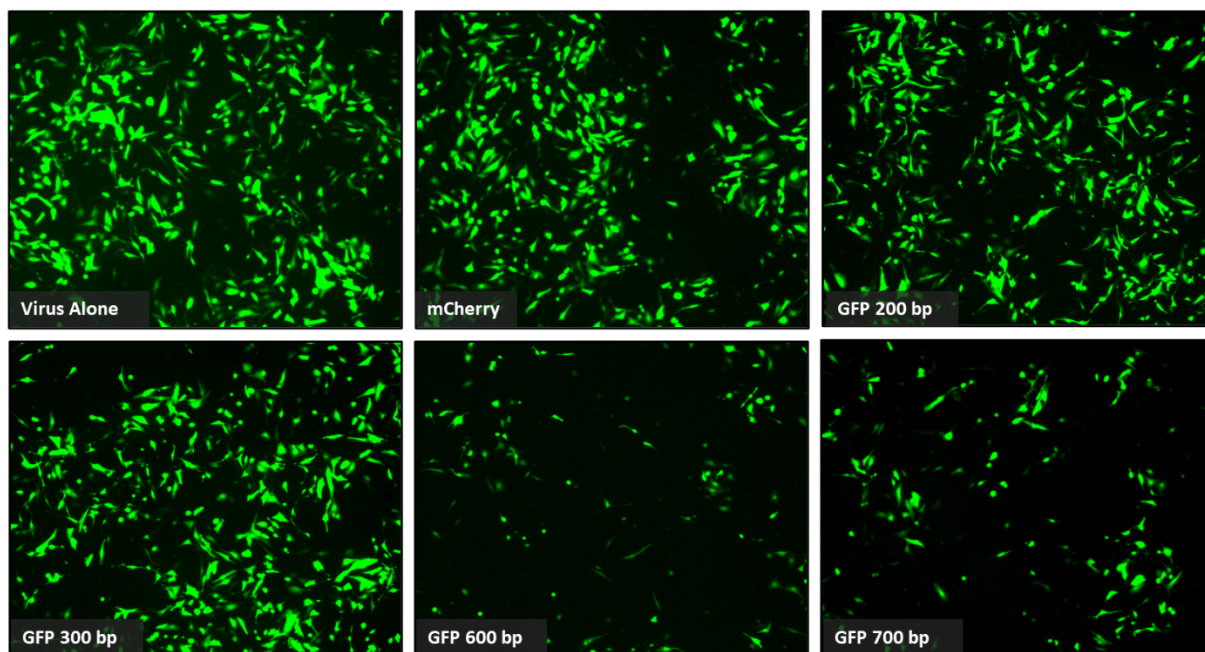

1026

1027

1028 Figure 3

1029

1030

1031

1032

1033

1034

1035

### A. THF and VSV-GFP

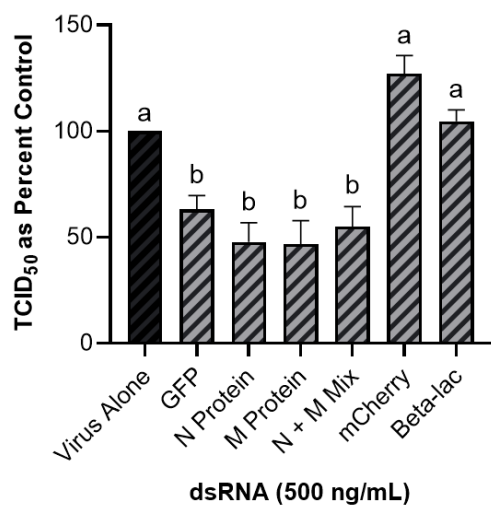

### B. SNB75 and VSV-GFP

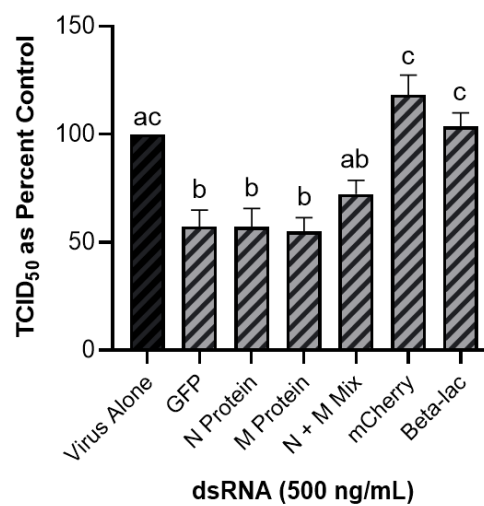

### C. MRC5 and HCoV-229E

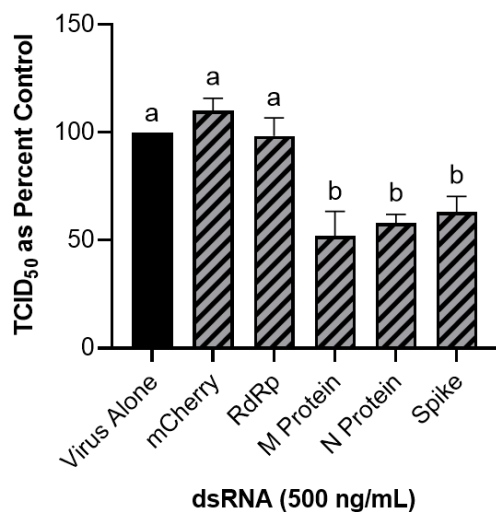

### D. Calu-3 and SARS-CoV-2

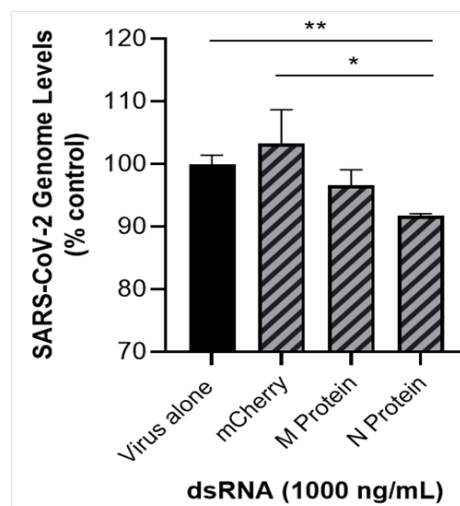

1036

1037 Figure 4

1038

1039

1040

1041

### A. pBEC Morphology

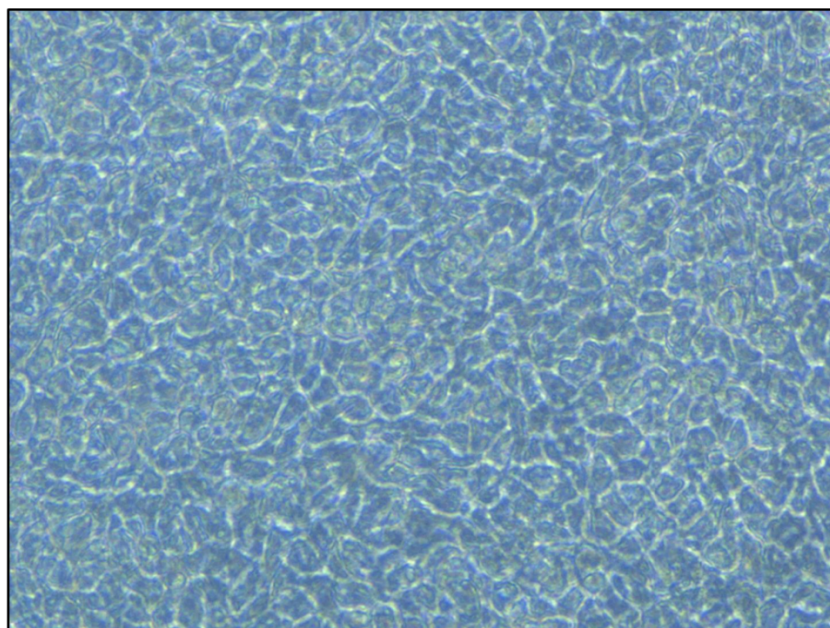

### B. pBECs and VSV-GFP

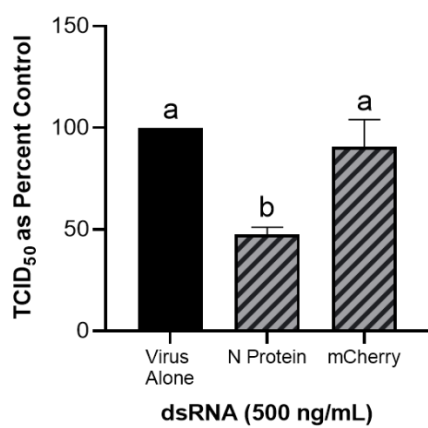

### C. pBECs and HCoV-229E

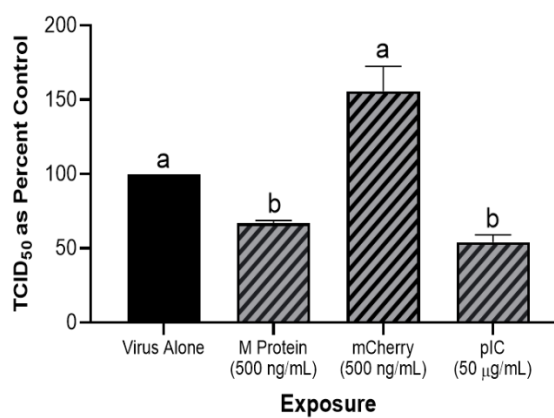

1042

1043

1044 Figure 5

1045

1046

1047

1048

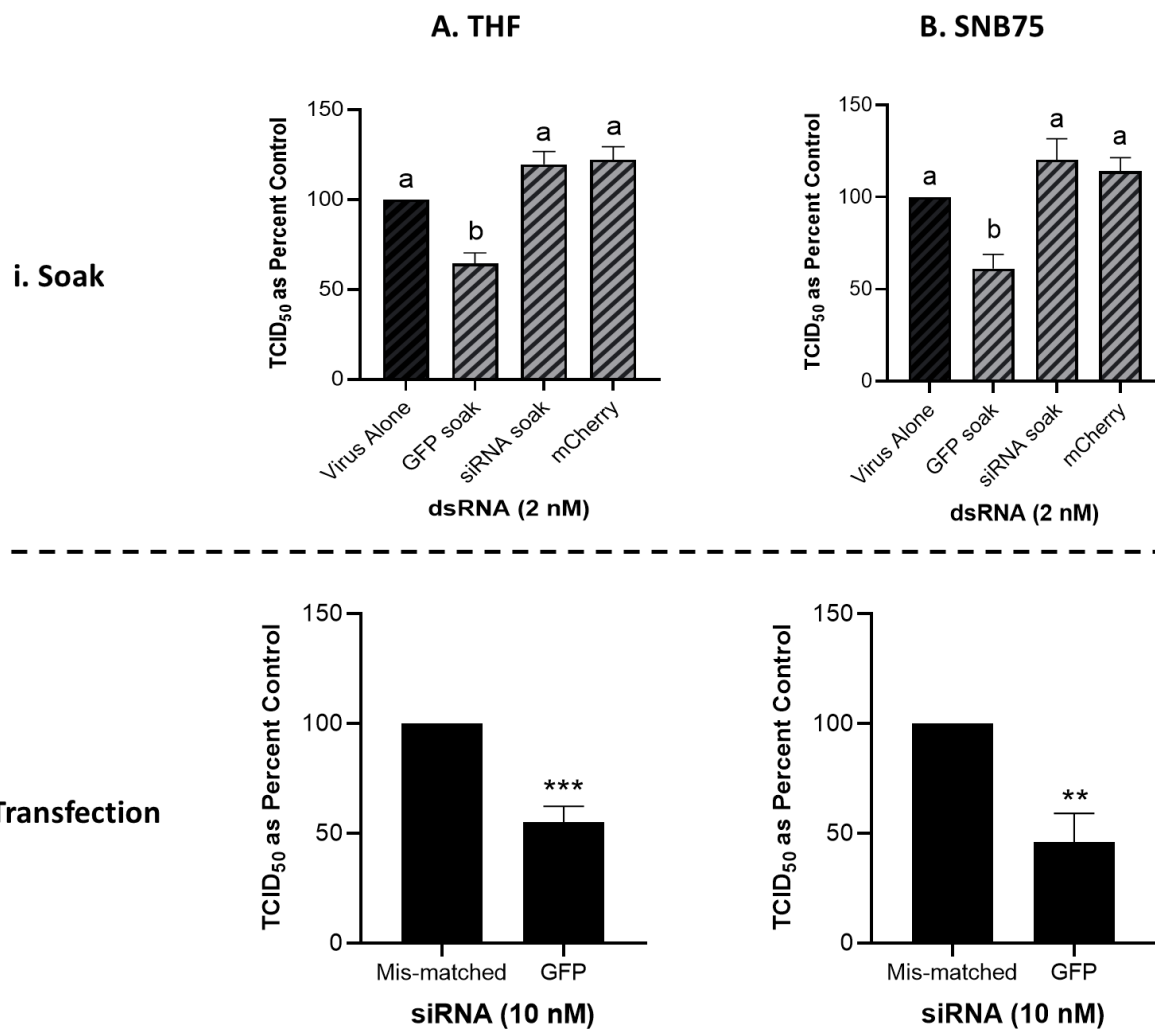

1049

1050

1051 Figure 6

1052

1053

A.

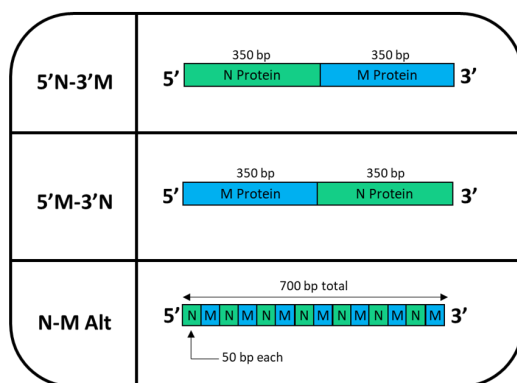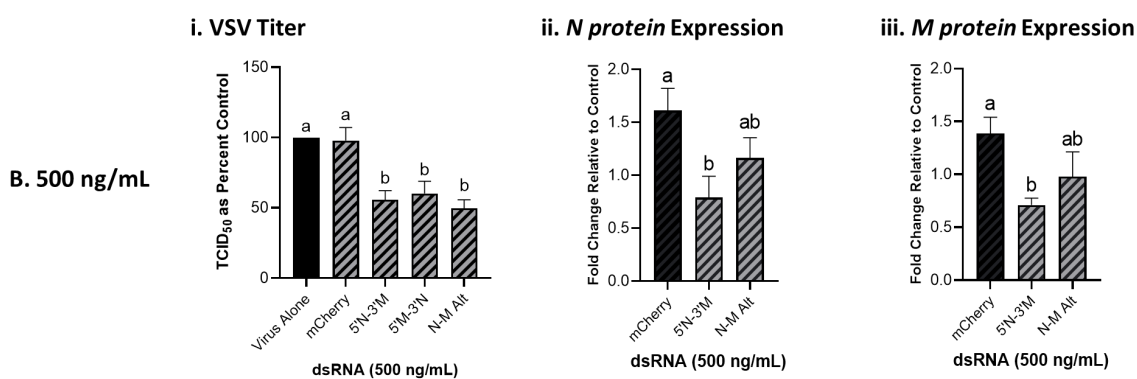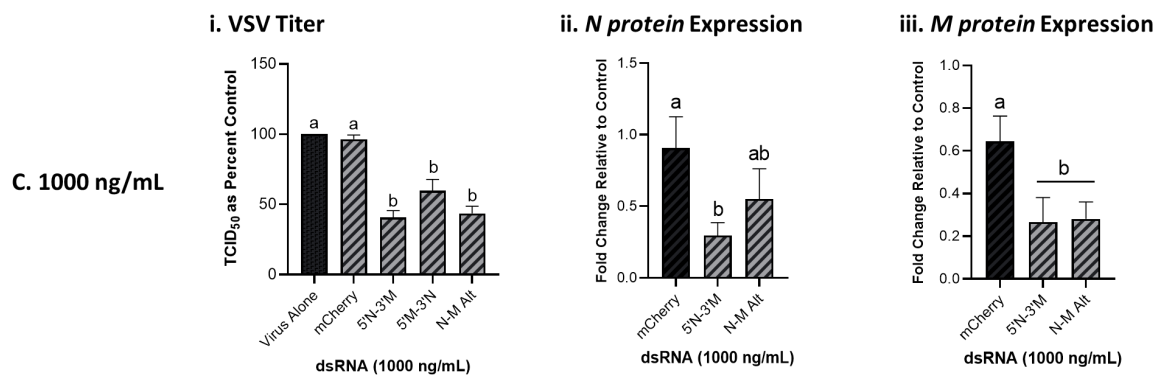

1054

1055 Figure 7

1056

1057

1058

1059

1060

**A. Dicer f/f**

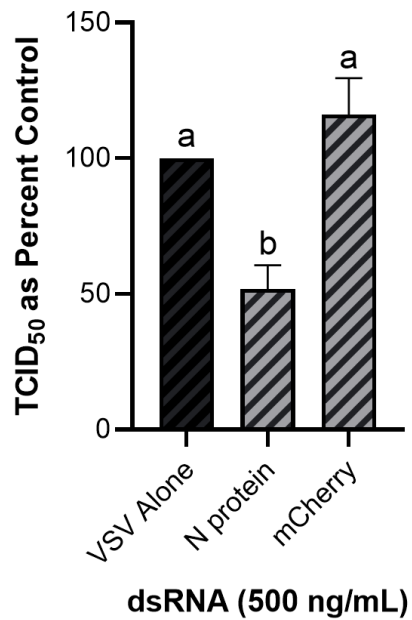

**B. Dicer -/-**

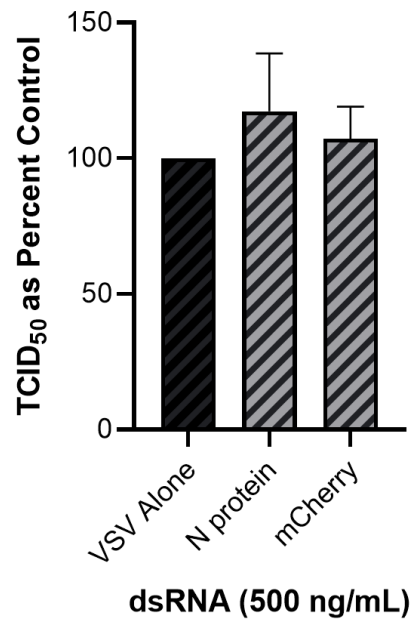

1061

1062

1063 Figure 8

1064

1065

1066

1067 **Supplemental Figure S1**

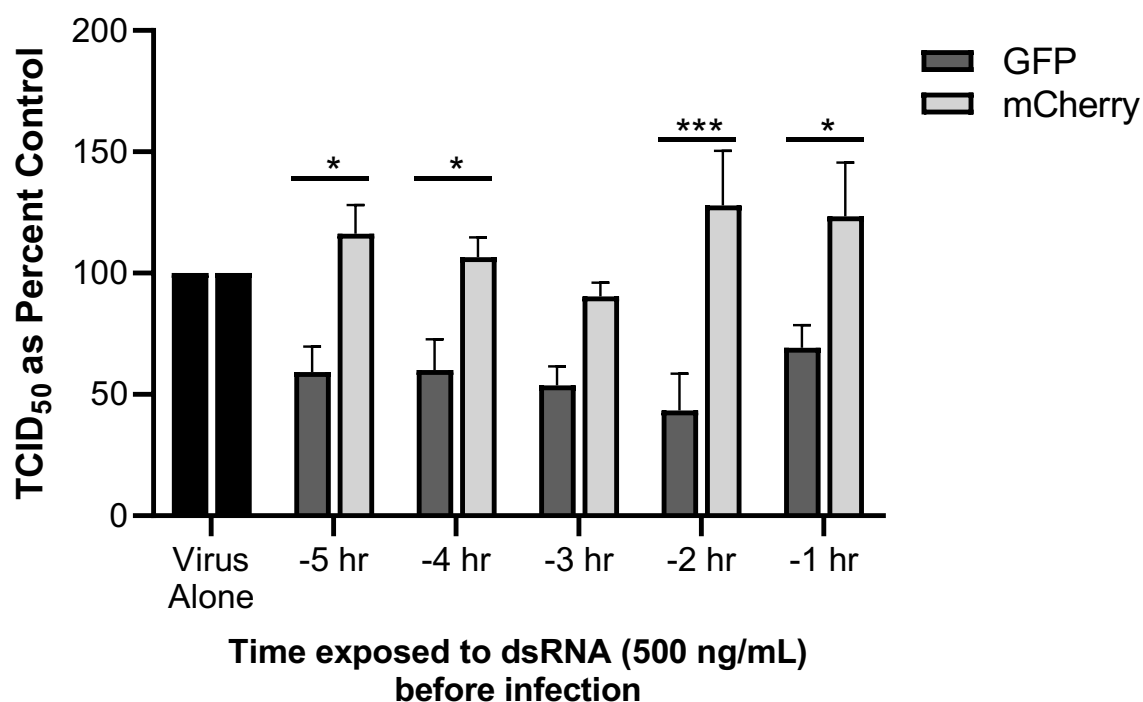

1068

1069

1070 **Supplementary Figure S1. dsRNA effective at limiting virus VSV-GFP replication 1-5h prior to**  
1071 **infection and at the time of infection.**

1072 M14 Cells (75,000 cells/well) were exposed to 500 ng/mL of each dsRNA (700 bp each) at various times  
1073 before infection with VSV-GFP (MOI = 1). Following 24 hours of infection, supernatants were collected  
1074 and the TCID<sub>50</sub> was calculated using HEL-299 cells. This has been repeated three times. Significant  
1075 differences were assessed between mCherry and GFP at each individual timepoint using a Sidak's  
1076 multiple comparisons test.
